# Rapid encoding of task regularities in the human hippocampus guides sensorimotor timing

Ignacio Polti<sup>1,2,\*</sup>, Matthias Nau<sup>1,2,\*</sup>, Raphael Kaplan<sup>1,3</sup>,  
Virginie van Wassenhove<sup>4</sup>, and Christian F. Doeller<sup>1,2,5</sup>

<sup>1</sup>Kavli Institute for Systems Neuroscience, Centre for Neural Computation, The Egil and Pauline Braathen and Fred Kavli Centre for Cortical Microcircuits, Jebsen Centre for Alzheimer's Disease, Norwegian University of Science and Technology, Trondheim, Norway

<sup>2</sup>Max-Planck-Institute for Human Cognitive and Brain Sciences, Leipzig, Germany

<sup>3</sup>Department of Basic Psychology, Clinical Psychology, and Psychobiology, Universitat Jaume I, Castellón de la Plana, Spain

<sup>4</sup>CEA DRF/Joliot, NeuroSpin; INSERM, Cognitive Neuroimaging Unit; CNRS, Université Paris-Saclay, Gif-Sur-Yvette, France

<sup>5</sup>Institute of Psychology, Leipzig University, Leipzig, Germany

*\*Shared-first authors*

## Abstract

The brain encodes the statistical regularities of the environment in a task-specific yet flexible and generalizable format. Here, we seek to understand this process by converging two parallel lines of research, one centered on sensorimotor timing, and the other on cognitive mapping in the hippocampal system. By combining functional magnetic resonance imaging (fMRI) with a fast-paced time-to-contact (TTC) estimation task, we found that the hippocampus signaled behavioral feedback and sensorimotor learning in each trial along with reward-processing regions. Critically, these hippocampal learning signals generalized across tested intervals and accounted for the trial-wise regression-to-the-mean biases in TTC estimation. This suggests that the capacity of the hippocampus to generalize supports the rapid encoding of temporal context even on short time scales in a behavior-dependent manner. Our results emphasize the central role of the hippocampus in statistical learning, positioning it at the core of a brain-wide network balancing task specificity vs. generalization for flexible behavior.

## 1 Introduction

2 When someone throws us a ball, we can anticipate its future trajectory, its speed and the time it  
3 will reach us. These expectations then inform the motor system to plan an appropriate action to  
4 catch it. Generating expectations and planning behavior accordingly builds on our ability to learn  
5 from past experiences and to encode the statistical regularities of the tasks we perform. At the  
6 core of this ability lies a continuous perception-action loop, initially proposed for sensorimotor  
7 systems (e.g. [Wolpert et al. \(2011\)](#)), which is now at the heart of many leading theories of brain  
8 function including active inference ([Friston et al., 2016](#)), predictive coding ([Huang & Rao, 2011](#)) and  
9 reinforcement learning ([Daw & Dayan, 2014](#)).

10 Critically, to effectively guide behavior in a dynamic environment, the brain needs to balance three  
11 primary objectives. First, it needs to capture the specific aspects of the task that inform the rel-  
12 evant behavior (e.g. the remaining time to catch the ball). Second, it needs to generalize from a  
13 limited set of examples to novel and noisy situations (e.g. by inferring how fast previous balls flew  
14 on average). Third, the sensorimotor representations that guide the behavior need to be updated  
15 flexibly whenever feedback about our actions becomes available (e.g. when we catch or miss the  
16 ball), or when task demands change (e.g. when someone throws us a frisbee instead). Herein, we  
17 refer to these objectives as specificity, generalization and flexibility. While these are all fundamen-  
18 tal principles underlying human cognition broadly, how the brain forms task representations that  
19 balance these three objectives remains unclear.

20 Here, we approach this question with a new perspective by converging two parallel lines of re-  
21 search centered on sensorimotor timing and hippocampal-dependent cognitive mapping. Specifi-  
22 cally, we test how the human hippocampus, an area implicated in memory formation on long time  
23 scales (days to weeks), may support the formation and flexible updating of sensorimotor-task rep-  
24 resentations even on short time scales (milliseconds to seconds). We do so by characterizing the  
25 relationship between hippocampal learning signals and behavioral performance in a fast-paced  
26 timing task, which is traditionally believed to be hippocampal-independent. We propose that the  
27 capacity of the hippocampus to generalize across task details ([Behrens et al., 2018](#); [Momennejad,](#)  
28 [2020](#); [Whittington et al., 2020](#)) situates it at the core of a brain-wide network balancing specificity  
29 vs. generalization in real time as the relevant behavior is performed.

30 An optimal behavioral domain to study these processes is sensorimotor timing ([Gershman et al.,](#)  
31 [2014](#); [Petter et al., 2018](#)). This is because prior work suggested that timing estimates indeed rely  
32 on learning temporal task regularities based on prior experiences ([Wolpert et al., 2011](#); [Jazayeri &](#)  
33 [Shadlen, 2010](#); [Acerbi et al., 2012](#); [Chang & Jazayeri, 2018](#)). Crucially, however, timing estimates are  
34 not always accurate. Instead, they reflect a trade-off between specificity and generalization, which  
35 is expressed in systematic behavioral biases. Estimated intervals regress towards the mean of the  
36 distribution of tested intervals ([Jazayeri & Shadlen, 2010](#)), a well-known effect that we will refer to as  
37 the regression effect ([Petzschner et al., 2015](#)). The regression effect suggests that the brain encodes  
38 a probability distribution of possible intervals rather than the exact information obtained in each  
39 trial ([Wolpert et al., 2011](#)). Timing estimates therefore depend not only on the interval tested in a  
40 trial, but also on the temporal context (i.e., the intervals tested in all other trials). This likely helps to  
41 predict and generalize to future scenarios and to adapt behavior accordingly ([Jazayeri & Shadlen,](#)  
42 [2010](#); [Acerbi et al., 2012](#); [Roach et al., 2017](#)).

43 Importantly, the hippocampus properly codes for time and temporal context on various scales ([Howard,](#)  
44 [2017](#)) and it has been shown to process behavioral feedback in decision-making tasks ([Shohamy &](#)  
45 [Wagner, 2008](#)), pointing to a role in feedback learning. Moreover, the hippocampal formation has

46 been implicated in generalizing the structure of a task away from the individual features that were  
47 tested (Kumaran, 2012; Schlichting & Preston, 2015; Schapiro et al., 2017; Wikenheiser et al., 2017;  
48 Behrens et al., 2018; Schuck & Niv, 2019; Whittington et al., 2020; Peer et al., 2021), providing a uni-  
49 fied account for its many proposed roles in navigation (Burgess et al., 2002), memory (Schiller et al.,  
50 2015; Eichenbaum, 2017) and decision making (Kaplan et al., 2017; Vikbladh et al., 2019). We pro-  
51 pose that the capacity of the human hippocampus to generalize supports the encoding of temporal  
52 context, which manifests as the regression effect in behavioral performance. It does so by forming  
53 an integrated representation of intervals that is continuously updated in a feedback-dependent  
54 manner. Using functional magnetic resonance imaging (fMRI) and a sensorimotor timing task, we  
55 here test this proposal empirically.

## 56 Results

57 In the following, we present our experiment and results in four steps. First, we introduce our task,  
58 which built on the estimation of the time-to-contact (TTC) between a moving fixation target and a  
59 visual boundary, as well as the behavioral and fMRI measurements we acquired. On a behavioral  
60 level, we show that participants' timing estimates systematically regress towards the mean of the  
61 tested intervals. Second, we demonstrate that hippocampal fMRI activity and functional connec-  
62 tivity tracks the behavioral feedback participants received in each trial, revealing a link between  
63 hippocampal processing and timing-task performance. Third, we show that this hippocampal feed-  
64 back modulation reflects improvements in behavioral performance over trials and signals learning  
65 in real time. Fourth, we show that these hippocampal learning signals were independent of the  
66 specific interval that was tested and reflected the magnitude of the behavioral regression effect  
67 in each trial. These results are consistent with the proposed role of the hippocampus in rapidly  
68 encoding task regularities for generalization in the time domain.

69 Notably, for each of the hippocampal main analyses, we also performed whole-brain voxel-wise  
70 analyses to uncover the larger brain network at play. We found that in addition to the hippocam-  
71 pus, regions typically important for sensorimotor timing and reward processing signaled learning  
72 in our task, particularly the striatum. Follow-up analyses further revealed a striking distinction  
73 in TTC-specific and TTC-generalized learning signals between striatal sub-regions. We conclude  
74 by discussing the potential neural underpinnings of these results and how the hippocampus may  
75 contribute to solving the trade-off between task specificity and generalization in concert with this  
76 larger brain network.

### 77 Time-to-contact (TTC) estimation task

78 We monitored whole-brain activity using fMRI with concurrent eye tracking in 34 participants per-  
79 forming a TTC task. This task offered a rich behavioral read-out and required sustained attention in  
80 every single trial. During scanning, participants visually tracked a fixation target, which moved on  
81 linear trajectories within a circular boundary. The target moved at one of four possible speed levels  
82 and in one of 24 possible directions (Fig. 1A, similar to Nau et al. (2018a)). The sequence of tested  
83 speeds was counterbalanced across trials. Whenever the target stopped moving, participants esti-  
84 mated when the target would have hit the boundary if it had continued moving. They did so while  
85 maintaining fixation, and they indicated the estimated TTC by pressing a button. Feedback about  
86 their performance was provided foveally and instantly with a colored cue. The received feedback  
87 depended on the timing error, i.e. the difference between objectively true and estimated TTC (Figs.  
88 1B), and it comprised 3 levels reflecting high, middle and low accuracy (Fig. 1C). Because timing

89 judgements typically follow the Weber-Fechner law (Rakitin et al., 1998), the feedback levels were  
 90 scaled relative to the ground-truth TTC of each trial. This ensured that participants were exposed  
 91 to approximately the same distribution of feedback at all intervals tested (Figs. 1C, S1B). After a  
 92 jittered inter-trial interval (ITI), the next trial began and the target moved into another direction  
 93 at a given speed. The tested speeds of the fixation target were counterbalanced across trials to  
 94 ensure a balanced sampling within each scanning run. Because the target always stopped moving  
 95 at the same distance to the boundary, matching the boundary's retinal eccentricity across trials,  
 96 the different speeds led to four different TTCs: 0.55, 0.65, 0.86 and 1.2 seconds. Each participant  
 97 performed a total of 768 trials. Please see Methods for more details.

### A) Visual tracking & time-to-contact (TTC) estimation

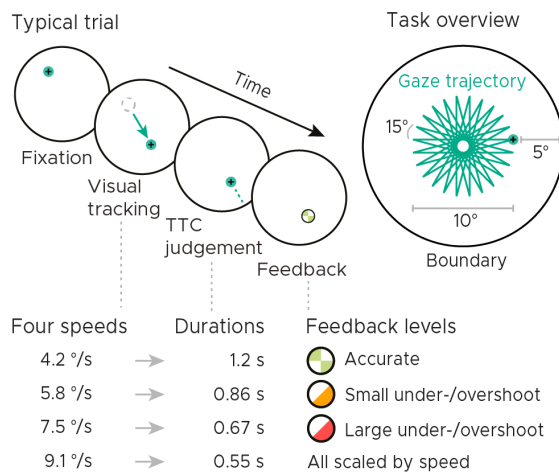

**Figure 1: Visual tracking and Time-To-Contact (TTC) estimation task.** A) Task design. In each trial during fMRI scanning, participants fixated a target (phase 1), which started moving at one of 4 possible speeds and in one of 24 possible directions for 10° visual angle (phase 2). After the target stopped moving, participants kept fixating and estimated when the fixation target would have hit a boundary 5° visual angle apart (phase 3). After pressing a button at the estimated TTC, participants received feedback (phase 4) according to their performance. Feedback was scaled relative to target TTC. B) Task performance. True and estimated TTC were correlated, showing that participants performed the task well. However, they overestimated short TTCs and underestimated long TTCs. Their estimates regressed towards the grand-mean of the TTC distribution (horizontal dashed line), away from the line of equality (diagonal dashed line). C) Feedback. On average, participants received high-accuracy feedback on half of the trials (also see Fig. S1B). BC) We plot the mean and SEM (black dots and lines) as well as single-participant data as dots. Feedback levels are color coded.

### B) TTC-task performance

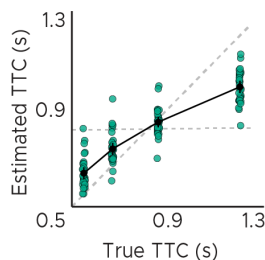

### C) Received feedback

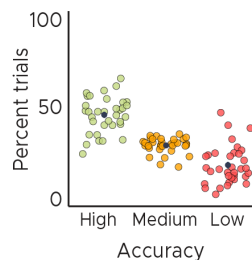

98 Analyzing the behavioral responses revealed that participants performed the task well and that  
 99 the estimated and true TTCs were tightly correlated (Fig. 1B; Spearman's  $\rho = 0.91, p = 2.2 \times 10^{-16}$ ).  
 100 However, participants' responses were also systematically biased towards the grand mean of the  
 101 TTC distribution (0.82 seconds), indicating that shorter durations tended to be overestimated and  
 102 longer durations tended to be underestimated. We confirmed this in all participants by examining  
 103 the slopes of linear regression lines fit to the behavioral responses (Fig. S1C). These slopes differed  
 104 from 1 (veridical performance; Fig. 1B, diagonal dashed line; one-tailed one-sample  $t$  test,  $t(33) =$   
 105  $-19.26, p = 2.2 \times 10^{-16}, d = -3.30, CI : [-4.22, -2.47]$ ) as well as from 0 (grand mean; Fig. 1B, horizontal  
 106 dashed line; one-tailed one-sample  $t$  test,  $t(33) = 21.62, p = 2.2 \times 10^{-16}, d = 3.71, CI : [2.79, 4.72]$ ) and  
 107 clustered at 0.5. Moreover, the slopes also correlated positively with behavioral accuracy across  
 108 participants (Fig. S1D; Spearman's  $\rho = 0.794, p = 2.1 \times 10^{-08}$ ), consistent with previous reports  
 109 (Cicchini et al., 2012). Notably, the regression effect we observed in behavior has been argued to  
 110 show that timing estimates indeed rely on the latent task regularities that our brain has encoded

111 (e.g. Jazayeri & Shadlen (2010)). It may therefore reflect a key behavioral adaptation helping to  
112 generalize from current experiences to future scenarios (Roach et al., 2017). Visualizing the timing  
113 error over trials and scanning runs further showed that participants' task performance improved  
114 over time (Fig. S1E; linear mixed-effects model with run as fixed effect and participants as the error  
115 term,  $F(3) = 3.2944, p = 0.024, \epsilon^2 = 0.06, CI : [0.00, 0.13]$ ), which suggests they were learning over the  
116 course of the experiment.

### 117 Behavioral feedback predicts hippocampal activity in the subsequent trial

118 Importantly, learning is expected to occur right after the value of the performed action became  
119 apparent, which is when participants received feedback. As a proxy for learning, we analyzed how  
120 activity in each voxel reflected the feedback participants received in the previous trial. Using a mass-  
121 univariate general linear model (GLM), we modeled the three feedback levels with one regressor  
122 each (high, medium, low) plus additional nuisance regressors (see methods for details). We then  
123 contrasted the beta weights estimated for high-accuracy vs. low-accuracy feedback and examined  
124 the effects on group-level averaged across runs.

#### A) Wide-spread brain activity reflects feedback received in past trial

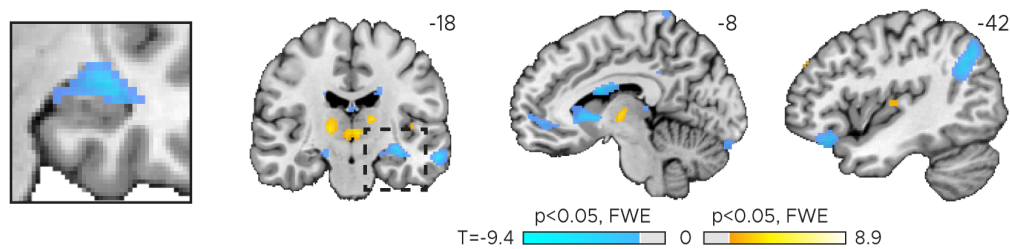

#### B) ROI analysis

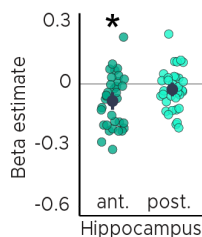

#### C) Feedback-dependent hippocampal connectivity

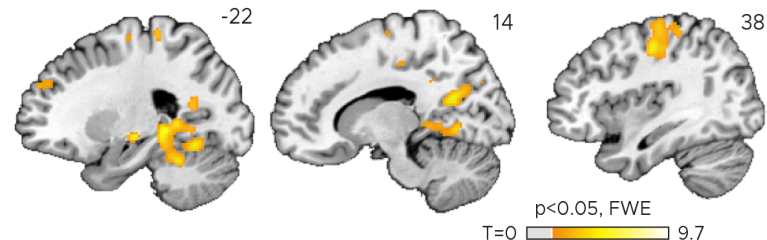

**Figure 2: Feedback on the previous trial (n-1) modulates network-wide activity and hippocampal connectivity in subsequent trials (n).** A) Voxel-wise analysis. Activity in each trial was modeled with a separate regressor as a function of feedback received in the previous trial. Insert zooming in on hippocampus added. B) Independent regions-of-interest analysis for the anterior (ant.) and posterior (post.) hippocampus. We plot the beta estimates obtained for the parametric modulator modeling trial-wise activity as a function of feedback in the previous trial. Negative values indicate that smaller errors, and higher-accuracy feedback, led to stronger activity. Depicted are the mean and SEM across participants (black dot and line) overlaid on single participant data (coloured dots). Activity in the anterior hippocampus is modulated by feedback received in previous trial. Statistics reflect  $p < 0.05$  at Bonferroni-corrected levels (\*) obtained using a group-level two-tailed one-sample t-test against zero. C) Feedback-dependent hippocampal connectivity. We plot results of a psychophysiological interactions (PPI) analysis conducted using the hippocampal peak effects in (A) as a seed. AC) We plot thresholded t-test results at 1mm resolution overlaid on a structural template brain. MNI coordinates added. Hippocampal activity and connectivity is modulated by feedback received in the previous trial.

125 In both our regions-of-interest (ROI) analysis and a voxel-wise analysis, we found that hippocampal  
126 activity could be predicted by the feedback participants received just before the trial had started  
127 (Figs. 2A, B). Higher-accuracy feedback resulted in overall stronger activity in the anterior section  
128 of the hippocampus (Figs. 2B, S2A; two-tailed one-sample  $t$  tests: anterior HPC,  $t(33) = -3.80, p =$

129  $5.9 \times 10^{-4}$ ,  $p_{fwe} = 0.001$ ,  $d = -0.65$ ,  $CI : [-1.03, -0.28]$ ; posterior HPC,  $t(33) = -1.60$ ,  $p = 0.119$ ,  $p_{fwe} =$   
130  $0.237$ ,  $d = -0.27$ ,  $CI : [-0.62, 0.07]$ ). Moreover, the voxel-wise analysis revealed similar feedback-  
131 related activity in the thalamus and the striatum (Fig. 2A). Note that there was no systematic re-  
132 lationship between subsequent trials on a behavioral level (Fig. S1A; two-tailed one-sample  $t$  test;  
133  $t(33) = 1.03$ ,  $p = 0.312$ ,  $d = 0.18$ ,  $CI : [-0.17, 0.52]$ ; see methods for details) and that the direction of  
134 the effects differed across regions (Fig 2A), speaking against potential feedback-dependent biases  
135 in attention. Instead, these results are consistent with the notion that hippocampal activity signals  
136 feedback learning in real time.

### 137 **Feedback-dependent hippocampal functional connectivity**

138 Having established that hippocampal activity reflected feedback in the TTC task, we reasoned that  
139 its activity may also show systematic co-fluctuations with other brain regions as well. To test this, we  
140 estimated the functional connectivity of a 4 mm radius sphere centered on the hippocampal peak  
141 main effect ( $x=-32$ ,  $y=-14$ ,  $z=-14$ ) using a seed-based psychophysiological interaction (PPI) analysis  
142 (see methods). We reasoned that larger timing errors and therefore low-accuracy feedback would  
143 result in stronger learning compared to smaller timing errors and high-accuracy feedback, a re-  
144 lationship that should also be reflected in the functional connectivity between the hippocampus  
145 and other regions. We specifically tested this using the PPI analysis by contrasting trials in which  
146 participants performed poorly compared to those trials in which they performed well.

147 We found that hippocampal activity co-fluctuated with activity in regions that were likely task-relevant,  
148 including the primary motor cortex, the parahippocampus and medial parietal lobe as well as the  
149 cerebellum (Fig. 2C). These co-fluctuations were stronger when participants performed poorly in  
150 the previous trial.

### 151 **Hippocampal activity reflects behavioral feedback in current trial**

152 The results presented so far indicate that hippocampal activity and functional connectivity reflect  
153 feedback received in the previous trial. Next, to test if the activity in this region also predicted the  
154 performance in the current trial, we conducted a GLM analysis in which we parametrically modeled  
155 the time course of each voxel and trial as a function of the feedback received at the end of the trial.

156 We again performed ROI-based and voxel-wise analyses for our regressors-of-interest (Figs. 3A, B),  
157 finding that the hippocampus indeed signaled the performance in the current trial (Figs. 3B, S2A;  
158 two-tailed one-sample  $t$  tests: anterior HPC,  $t(33) = -5.92$ ,  $p = 1.2 \times 10^{-6}$ ,  $p_{fwe} = 2.4 \times 10^{-6}$ ,  $d = -1.02$ ,  $CI :$   
159  $[-1.45, -0.60]$ ; posterior HPC,  $t(33) = -4.07$ ,  $p = 2.7 \times 10^{-4}$ ,  $p_{fwe} = 5.4 \times 10^{-4}$ ,  $d = -0.70$ ,  $CI : [-1.09, -0.32]$ )  
160 in addition to the feedback received in the previous trial (Fig. 2). Notably, our whole-brain analysis  
161 revealed similar effects in the striatum, thalamus, cerebellum, motor cortex, insula as well as the  
162 frontal eye fields (Fig. 3A).

163 Each trial comprised multiple distinct phases, ranging from tracking the moving target over estimat-  
164 ing the TTC to receiving feedback. To characterize the potentially dynamic relationship between ac-  
165 tivity and TTC-task performance in detail, we repeated the voxel-wise analysis for each trial phase  
166 separately (Fig. S3). We modelled each phase with a distinct regressor in a new GLM, finding strong  
167 differences between the trial phases in most of the observed areas. The hippocampus was again  
168 most strongly modulated when participants received feedback (Fig. S3). While the results obtained  
169 for the three phases are not independent due to the inherent temporal-order effects within each  
170 trial (Fig. 1A), they nevertheless suggest that the relationship between activity in each area and  
171 the behavioral outcome in the TTC-task is dynamic. Moreover, the fact that the hippocampus was

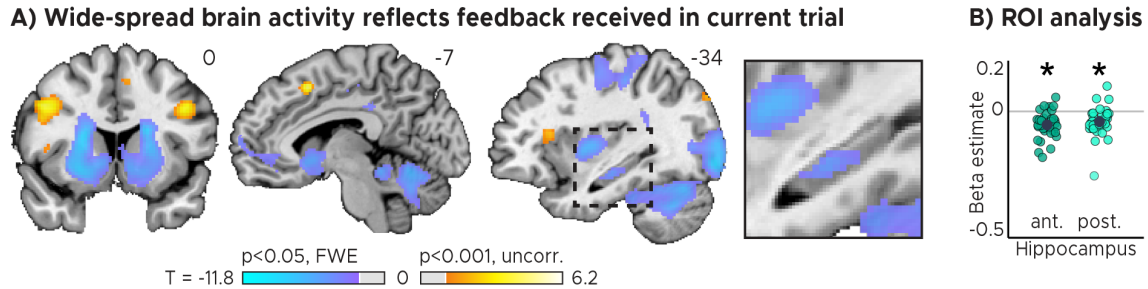

**Figure 3: Brain regions signalling behavioral feedback in current trial. Activity in each trial was modeled parametrically as a function of the feedback received at the end of the trial. A) Voxel-wise analysis. We plot thresholded t-test results at 1 mm resolution overlaid on a structural template brain. MNI coordinates and insert zooming in on the hippocampus added. A large network of regions signalling TTC performance included the hippocampus, striatum and cerebellum. B) Independent regions-of-interest analysis for the anterior (ant.) and posterior (post.) hippocampus. We plot the beta estimate obtained for the parametric modulator modeling trial-wise activity as a function of task performance. Negative values indicate that smaller errors, and higher-accuracy feedback, led to stronger activity. Depicted are the means and SEM across participants (black dot and line) overlaid on single participant data (coloured dots). Statistics reflect  $p < 0.05$  at Bonferroni-corrected levels (\*) obtained using a group-level two-tailed one-sample t-test against zero.**

172 most strongly modulated in the feedback phase is again consistent with a role in rapid sensorimotor learning.  
173

174 These results show that the hippocampus, along with other regions, signals the feedback received  
175 in the previous and current trial. Critically, this is the case even though the actual feedback received  
176 was independent across trials (Fig. S1A; two-tailed one-sample  $t$  test;  $t(33) = 1.03, p = 0.312, d =$   
177  $0.18, CI : [-0.17, 0.52]$ ; see methods). This suggests that these current and past-trial effects rest at  
178 least partially on independent variance in the fMRI signal.

### 179 Hippocampal activity explain accuracy and biases in task performance

180 Two critical open questions remained. First, did the observed feedback modulation actually reflect  
181 learning and therefore behavioral improvements over trials? Second, was the information that was  
182 learned specific to the interval that was tested in a given trial, likely serving task specificity, or was  
183 independent of the tested interval, potentially serving generalization? To answer these questions  
184 in one analysis, we used a GLM modeling activity not as a function of feedback received in the  
185 previous trial (Fig. 2) or current trial (Fig. 3), but as a function of the difference in feedback between  
186 trials (Fig. 4). Specifically, we modeled with two separate parametric regressors the improvements  
187 in TTC task performance across subsequent trials (regressor 1: TTC-generalized learning) as well  
188 as the improvements over subsequent trials in which the same TTC interval was tested (regressor  
189 2: TTC-specific learning). We again accounted for nuisance variance as before, and we contrasted  
190 trials in which participants had improved versus the ones in which they had not improved or got  
191 worse (see methods for details).

192 We found both TTC-specific and TTC-generalized learning activity throughout cortical and subcor-  
193 tical regions. Distinct areas engaged in either one or in both of these processes (Figs. 4A, S4).  
194 Crucially, we found that hippocampal activity signaled behavioral improvements independent of  
195 the TTC intervals tested. This effect was localized to the posterior section of the hippocampus (Fig.  
196 4B, S2A; one-tailed one-sample  $t$  tests; TTC-generalized: anterior HPC,  $t(33) = 0.36, p = 0.360, p_{fwe} =$   
197  $1, d = 0.06, CI : [-0.28, 0.40]$ , posterior HPC,  $t(33) = 2.81, p = 0.004, p_{fwe} = 0.017, d = 0.48, CI : [0.12, 0.85]$ ;  
198 TTC-specific: anterior HPC,  $t(33) = 0.57, p = 0.285, p_{fwe} = 1, d = 0.10, CI : [-0.24, 0.44]$ , posterior HPC,  
199  $t(33) = 1.29, p = 0.103, p_{fwe} = 0.413, d = 0.22, CI : [-0.12, 0.57]$ ). We then again estimated the functional

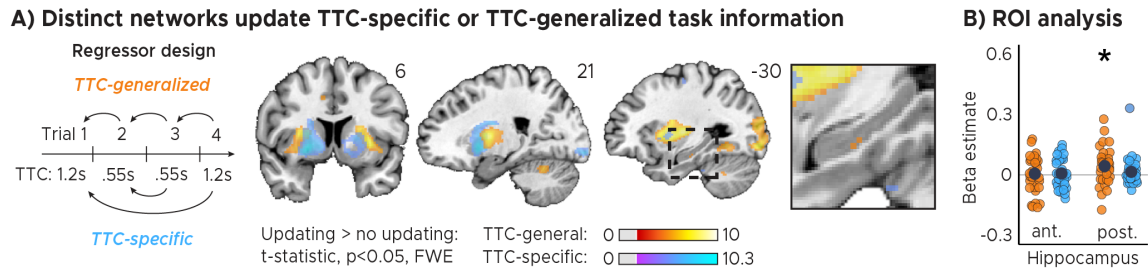

**Figure 4: Distinct cortical and subcortical networks signal learning of TTC-specific and TTC-generalized task information. A) Left panel: Visual depiction of parametric modulator design. Two regressors per run modeled the improvement in behavioral performance since the last trial independent of the tested TTC (Regressor 1: TTC-generalized) or the improvement since the last trial when the same target TTC was tested (Regressor 2: TTC-specific). Right panel: Voxel-wise analysis results for TTC-specific and TTC-generalized regressors. We plot thresholded t-test results at 1mm resolution at  $p < 0.05$  whole-brain Family-wise-error (FWE) corrected levels overlaid on a structural template brain. Insert zooming in on hippocampus and MNI coordinates added. B) Independent regions-of-interest analysis for the anterior (ant.) and posterior (post.) hippocampus. We plot the beta estimates obtained for TTC-generalized in orange and TTC-specific regressors in blue. Depicted are the mean and SEM across participants (black dot and line) overlaid on single participant data as dots. Statistics reflect  $p < 0.05$  at Bonferroni-corrected levels (\*) obtained using a group-level one-tailed one-sample t-test against zero.**

200 connectivity profile of the hippocampal main effect using a PPI analysis (sphere with 4mm radius  
 201 centered on the peak voxel at  $x = -30, y = -24, z = -18$ ), revealing co-fluctuations in multiple regions  
 202 including the putamen and the thalamus that were specific to behavioral improvements (Fig. S5).

203 These results suggest that the hippocampus updates information that is independent of the target  
 204 TTC. In our task, an efficient way of generalizing across TTCs is to bias one's responses towards the  
 205 mean of the TTC distribution, which corresponds to the regression effect that we observed on a  
 206 behavioral level (Figs. 1B, S1C). Given the hippocampal feedback modulation and learning effects  
 207 we reported above, we hypothesized that hippocampal activity should also reflect the magnitude of  
 208 the regression effect in behavior. To test this in a final analysis, we modeled the activity in each trial  
 209 parametrically either as a function of performance (i.e. the absolute difference between estimated  
 210 and true TTC) or as a function of the strength of the regression effect in each trial (i.e. the absolute  
 211 difference between the estimated TTC and the mean of the tested intervals). Voxel-wise weights  
 212 for these two regressors were estimated in two independent GLMs (see methods for details).

213 Our analyses showed that trial-wise hippocampal activity increased with better TTC-task perfor-  
 214 mance (Figs. 5A, B; two-tailed one-sample  $t$  tests; anterior HPC,  $t(33) = -4.85, p = 2.9 \times 10^{-5}, p_{fwe} =$   
 215  $5.8 \times 10^{-5}, d = -0.83, CI : [-1.24, -0.44]$ ; posterior HPC,  $t(33) = -2.88, p = 0.007, p_{fwe} = 0.014, d =$   
 216  $-0.49, CI : [-0.86, -0.14]$ ), consistent with the previously reported feedback modulation (Fig. 3).  
 217 In addition, however, and as predicted, it also reflected how strongly participants' TTC estimates  
 218 regressed towards the mean of the sampled intervals (Figs. 5A, B; two-tailed one-sample  $t$  tests;  
 219 anterior HPC,  $t(33) = -5.55, p = 3.6 \times 10^{-6}, p_{fwe} = 1.1 \times 10^{-5}, d = -0.95, CI : [-1.37, -0.55]$ ; posterior  
 220 HPC,  $t(33) = -1.06, p = 0.295, p_{fwe} = 0.886, d = -0.18, CI : [-0.53, 0.16]$ ). Notably, similar effects were  
 221 observed in prefrontal and posterior cingulate areas (Fig. 5A).



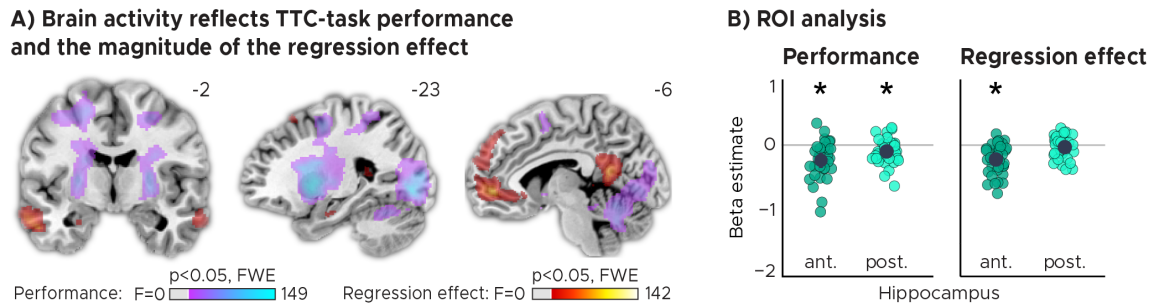

**Figure 5: TTC-task performance vs. behavioral regression effect. A) Voxel-wise analysis.** We plot thresholded F-test results for the task-performance regressor and the regression-to-the-mean regressor at 1 mm resolution overlaid on a structural template brain. MNI coordinates added. Distinct networks reflect task performance and the magnitude of the regression effect. **B) Independent regions-of-interest analysis for the anterior (ant.) and posterior (post.) hippocampus.** We plot the beta estimates obtained for each participant for each of the two regressors. Negative values indicate a linear increase between hippocampal activity and either task performance (blue dots) or the magnitude of the regression effect (orange dots). Depicted are the mean and SEM across participants (black dot and line) overlaid on single participant data (blue and orange dots). Statistics reflect  $p < 0.05$  at Bonferroni-corrected levels (\*) obtained using a group-level two-tailed one-sample t-test against zero.

## 222 Eye tracking: no relevant biases in viewing behavior

223 To ensure that our results could not be attributed to systematic error patterns in viewing behavior,  
224 we analyzed the co-recorded eye tracking data of our participants in detail. After data cleaning (see  
225 methods), we used Kruskal-Wallis tests to control for differences in fixation accuracy across speed  
226 levels (Fig. S6A;  $\chi(2) = 0.61, p = 0.895, \epsilon^2 = 0.005, CI : [0.00, 0.06]$ ) and received-feedback levels (Fig.  
227 S6B;  $\chi(2) = 0.190, p = 0.909, \epsilon^2 = 0.002, CI : [0.00, 0.10]$ ). Moreover, we examined the relationship  
228 of the fixation error with TTC-task performance (Fig. S6C; Spearman's  $\rho = 0.17, p = 0.344$ ) as well  
229 as with the behavioral regression effect (Fig. S6C; Spearman's  $\rho = 0.26, p = 0.131$ ). None of these  
230 control analyses suggested that biased patterns in viewing behavior could hinder the interpretation  
231 of our results.

## 232 Discussion

233 This study investigated how the brain extracts the statistical regularities of a sensorimotor timing  
234 task in a feedback-dependent manner. We specifically focused on the hippocampus, due to its  
235 known role in temporal coding and learning, asking how hippocampal processing may support  
236 behavioral flexibility, specificity and generalization. Moreover, we explored the larger brain-wide  
237 network involved in balancing these objectives. To do so, we monitored human brain activity with  
238 fMRI while participants estimated the time-to-contact between a moving target and a visual bound-  
239 ary. This allowed us to analyze brain activity as a function of task performance and as a function  
240 of the improvements in performance over time. We found that hippocampal activity as well as  
241 functional connectivity reflected the feedback participants received during this task, and its activity  
242 followed the performance improvements in a temporal-context-dependent manner. Unlike other  
243 regions such as the caudate, it signaled sensorimotor learning independent of the specific intervals  
244 tested and its activity reflected trial-wise behavioral biases towards the mean of the sampled inter-  
245 vals. In what follows, we discuss our results in the context of prior work on timing behavior and  
246 on hippocampal spatiotemporal coding. Moreover, we elaborate on the domain-general nature  
247 of hippocampal-cortical interactions and of the learning mechanisms that potentially underlie the  
248 effects observed in this study.

## 249 Spatiotemporal coding in the hippocampus

250 The hippocampus encompasses neurons sensitive to elapsed time (Paton & Buonomano, 2018;  
251 Eichenbaum, 2014; Umbach et al., 2020). These cells might play an important role in guiding tim-  
252 ing behavior (Nobre & van Ede, 2018), which potentially explains why hippocampal damage or  
253 inactivation impairs the ability to estimate durations in rodents (Meck et al., 1984) and humans  
254 (Richards, 1973). Our results are in line with these reports, showing that hippocampal fMRI activity  
255 also reflects participants' TTC estimation ability (Figs. 3, 5). They are also in line with other human  
256 neuroimaging studies suggesting that the hippocampus bridges temporal gaps between two stim-  
257 uli during trace eyeblink conditioning (Cheng et al., 2008), and that it represents duration within  
258 event sequences (Barnett et al., 2014; Thavabalasingam et al., 2018, 2019). Our results speak to the  
259 above-mentioned reports by revealing that the hippocampus is an integral part of a widespread  
260 brain network contributing to sensorimotor learning of intervals in humans (Figs. 2,3,4,5,S3,S4,S5).  
261 Moreover, they demonstrate a direct link between hippocampal activity, the feedback participants  
262 received and the behavioral improvements expressed over time (Fig. 4), emphasizing its role in  
263 feedback learning. Critically, the underlying learning process must occur in real-time when feed-  
264 back is presented, suggesting that it plays out on short time scales. Notably, the human hippocam-  
265 pus is neither typically linked to sensorimotor timing tasks such as ours, nor is its activity considered  
266 to reflect temporal relationships on such short time scales. Instead, human hippocampal process-  
267 ing is often studied in the context of much longer time scales (Schiller et al., 2015; Eichenbaum,  
268 2017), which showed that it may support the encoding of the progression of events into long-term  
269 episodic memories (Deuker et al., 2016; Montchal et al., 2019; Bellmund et al., 2021) or contribute  
270 to the establishment of chronological relations between events in memory (Gauthier et al., 2019,  
271 2020). Intriguingly, the mechanisms at play may build on similar temporal coding principles as  
272 those discussed for motor timing (Yin & Troger, 2011; Eichenbaum, 2014; Howard, 2017; Palombo  
273 & Verfaellie, 2017; Nobre & van Ede, 2018; Paton & Buonomano, 2018; Bellmund et al., 2020, 2021;  
274 Shikano et al., 2021; Shimbo et al., 2021).

275 Our task can be solved by estimating temporal intervals directly, but also by extrapolating the move-  
276 ment of the fixation target over time, shifting the locus of attention towards the target boundary  
277 (Fig. 1). The brain may therefore likely monitor the temporal and spatial task regularities in parallel.  
278 Participants' TTC estimates were further informed exclusively by the speed of the target, which in-  
279 herently builds on tracking kinematic information over time, which may explain why TTC tasks also  
280 engage visual motion regions in humans (de Azevedo Neto & Amaro Júnior, 2018). While future  
281 studies could tease apart spatial and temporal factors explicitly, our results are in line with both  
282 accounts. For example, the hippocampus and surrounding structures represent maps of visual  
283 space in primates, which potentially mediate a coordinate system for planning behavior, integrat-  
284 ing visual information with existing knowledge and to compute vectors in space (Nau et al., 2018;  
285 Bicanski & Burgess, 2020). These visuospatial representations are perfectly suited to guide atten-  
286 tion and therefore the relevant behaviors in our task (Aly & Turk-Browne, 2017), which could be  
287 tested in the future akin to prior work using a similar paradigm (Nau et al., 2018a).

## 288 The role of feedback in timed motor actions

289 Importantly, our results neither imply that the hippocampus acts as an "internal clock", nor do we  
290 think of it as representing action sequences or coordinating motor commands directly. Rather,  
291 its activity may indicate the feedback-dependent updating of encoded information more generally  
292 and independent of the task that was used. The hippocampal formation has been proposed as a  
293 domain-general learning system (Kumaran, 2012; Schlichting & Preston, 2015; Chersi & Burgess,

294 2015; Schapiro et al., 2017; Wikenheiser et al., 2017; Behrens et al., 2018; Vikbladh et al., 2019;  
295 Geerts et al., 2020; Momennejad, 2020), which may encode the structure of a task abstracted away  
296 from our immediate experience. In contrast, the striatum was proposed to encode sensory states  
297 or actions, supporting the learning of task-specific (egocentric) information (Chersi & Burgess, 2015;  
298 Geerts et al., 2020). Together, the two regions may therefore play an important role in decision  
299 making in general also in other non-temporal domains.

300 Consistent with these ideas, we observed that striatal and hippocampal activity was modulated  
301 by behavioral feedback received in each trial (Figs. 2, 3). Similar feedback signals have been pre-  
302 viously linked to learning (Schönberg et al., 2007; Cohen & Ranganath, 2007; Shohamy & Wagner,  
303 2008; Foerde & Shohamy, 2011; Wimmer et al., 2012) and the successful formation of hippocampal-  
304 dependent long-term memories in humans (Wittmann et al., 2005). Moreover, hippocampal activity  
305 is known to signal learning in other tasks (Doeller et al., 2008; Foerde & Shohamy, 2011; Dickerson  
306 & Delgado, 2015; Wirth et al., 2009; Schapiro et al., 2017; Kragel et al., 2021). Here, we show a direct  
307 relationship between such rapid learning signals and ongoing timing behavior, and we show that  
308 receiving behavioral feedback modulates widespread brain activity (Figs. 2, 3), which potentially  
309 reflects the involvement of these areas in the coordination of reward behavior observed earlier  
310 (LeGates et al., 2018). These regions include those serving sensorimotor functions, but also those  
311 encoding the structure of a task or the necessary value functions associated with specific actions  
312 (Lee et al., 2012).

313 The present study further demonstrates that activity in the hippocampus co-fluctuates with activity  
314 in other likely task-relevant regions in a task-dependent manner. We observed such co-fluctuations  
315 in the striatum and cerebellum, often associated with reward processing and action coordination  
316 (Bostan & Strick, 2018; Cox & Witten, 2019), the motor cortex, typically involved in action planning  
317 and execution, as well as the parahippocampus and medial parietal lobe, often associated with  
318 visual-scene analysis (Epstein & Baker, 2019). This may indicate that behavioral feedback also af-  
319 fects the functional connectivity profile of the hippocampus with those domain-selective regions  
320 that are currently engaged in the ongoing task.

321 What might be the neural mechanism underlying feedback-learning in our task? Prior work has  
322 shown that hippocampal, frontal and striatal temporal receptive fields scale relative to the tested  
323 intervals, and that they re-scale dynamically when those tested intervals change (MacDonald et  
324 al., 2011; Gouvêa et al., 2015; Mello et al., 2015; Wang et al., 2018). This may enable the encoding  
325 and continuous maintenance of optimal task priors, which keep our actions well-adjusted to our  
326 current needs. We speculate that such receptive-field re-scaling also underlies the learning effects  
327 discussed here, which likely build on both local and network-wide re-weighting of functional con-  
328 nections between neurons and entire regions. Consistent with this idea and the present results,  
329 receptive-field re-scaling can occur on a trial-by-trial basis in the hippocampus (Shikano et al., 2021;  
330 Shimbo et al., 2021) but also in other regions such as the striatum (Mello et al., 2015; Gouvêa et al.,  
331 2015; Wang et al., 2018).

### 332 **A trade-off between specificity and generalization?**

333 So far, we discussed how the brain may capture the temporal structure of a task and how the  
334 hippocampus supports this process. However, how do we encode specific task details while still  
335 forming representations that generalize well to new scenarios? In other words, how does the brain  
336 encode the probability distribution of the intervals we tested optimally without overfitting? Our  
337 behavioral and neuroimaging results suggest that this trade-off between specificity and general-

338 ization is governed by many regions, updating different types of task information in parallel (Fig.  
339 4A). For example, hippocampal activity reflected performance improvements independent of the  
340 tested interval, whereas the caudate signaled improvements specifically over those trials in which  
341 the same TTC was tested. In the putamen, we found evidence for both processes (Fig. S4B). This  
342 suggests that different regions encode distinct task regularities in parallel to form optimal sensori-  
343 motor representations to balance specificity and generalization.

344 Notably, our results make a central prediction for future research. We anticipate that participants  
345 with stronger learning-related activity in the hippocampus should be able to generalize better to  
346 new scenarios, for example when new intervals are tested. While we could not test this prediction  
347 directly in our study, we did test for a link to a related phenomenon, and that is the regression  
348 effect we observed on the behavioral level. We found that TTC estimates regressed towards the  
349 mean of the sampled intervals in all participants (Figs. 1B, S1C), an effect that is well known in  
350 the timing literature (Jazayeri & Shadlen, 2010) and other domains (Petzschner & Glasauer, 2011;  
351 Petzschner et al., 2015). This regression effect likely supports generalization (Roach et al., 2017), be-  
352 cause time estimates are biased towards the mean of the tested intervals, and because the mean  
353 will likely be close to the mean of possible future intervals. We therefore hypothesized that this  
354 effect is grounded in the activity of the hippocampus, because it plays a central role in generaliza-  
355 tion in other non-temporal domains (Kumaran, 2012; Schlichting & Preston, 2015; Schapiro et al.,  
356 2017; Momennejad, 2020). Our analyses revealed that this was indeed the case. We found that  
357 hippocampal activity followed the magnitude of the regression effect in each trial (Fig. 5), poten-  
358 tially reflecting the temporal-context-dependent learning of the grand mean of the tested intervals  
359 (Jazayeri & Shadlen, 2010).

360 In addition, our voxel-wise results showed that striatal subregions only tracked how accurate partic-  
361 ipants' responses were, not how strongly they regressed towards the mean (Fig. 5A). This dovetails  
362 with literature on spatial-navigation (Doeller et al., 2008; Chersi & Burgess, 2015; Goodroe et al.,  
363 2018; Gahnstrom & Spiers, 2020; Geerts et al., 2020; Wiener et al., 2016), showing that the striatum  
364 supports the reinforcement-dependent encoding of locations relative to landmarks, whereas the  
365 hippocampus may help to encode the structure of the environment in a generalizable and map-like  
366 format. This matches the functional differences observed here in the time domain, where caudate  
367 activity reflects the encoding of individual details of our task such as the TTC intervals (Figs. 4A, S4A,  
368 B), while the hippocampus generalizes across TTCs to encode the overall task structure (Figs. 4A,  
369 B, S4A).

## 370 **Conclusion**

371 In sum, we combined fMRI with time-to-contact estimations to show that the hippocampus sup-  
372 ports the formation of task-specific yet flexible and generalizable sensorimotor representations  
373 in real time. Hippocampal activity reflected trial-wise behavioral feedback and the behavioral im-  
374 provements across trials, suggesting that it supports sensorimotor learning even on short time  
375 scales. The observed feedback-learning signals generalized across tested intervals, and they ex-  
376 plained the regression-to-the-mean biases observed on a behavioral level, which suggests that the  
377 hippocampus may encode temporal context in a behavior-dependent manner. We show that it  
378 does so even in a fast-paced timing task typically considered to be hippocampal-independent. Our  
379 results show that the hippocampus supports rapid and feedback-dependent sensorimotor learn-  
380 ing, making it a central component of a brain-wide network balancing task specificity vs. general-  
381 ization for flexible behavior in humans.

## 382 **Acknowledgements**

383 We thank Raymundo Machado de Azevedo Neto for helpful comments on an earlier version of this  
384 manuscript. This work is funded by the European Research Council (ERC-CoG GEOCOG 724836  
385 awarded to CFD). CFD's research is further supported by the Max Planck Society, the Kavli Founda-  
386 tion, the Jebsen foundation, the Centre of Excellence scheme of the Research Council of Norway –  
387 Centre for Neural Computation (223262/F50), The Egil and Pauline Braathen and Fred Kavli Centre  
388 for Cortical Microcircuits and the National Infrastructure scheme of the Research Council of Norway  
389 – NORBRAIN (197467/F50). RK's research is supported by a CIDEAGENT grant (CIDEAGENT/2021/027)  
390 from the Valencian Community's program for the support of talented researchers.

## 391 **Author Contributions**

392 MN, IP and CFD developed the research questions. MN conceived the experimental idea. IP and MN  
393 designed the experimental paradigm, visualized the results and embedded them in the literature  
394 with help from RK, VW and CFD. IP implemented the experimental code and acquired and analyzed  
395 the data with close supervision and help from MN. MN wrote the manuscript with help from IP. CFD  
396 secured funding. RK, VW and CFD provided critical feedback and all authors discussed the results  
397 and edited the final manuscript. IP and MN are shared-first authors.

## 398 **Declaration of interest**

399 The authors declare no conflicts of interest.

## 400 **Data and code availability**

401 Source data and analysis code will be shared upon publication. Raw data are available from the  
402 authors upon request.

## 403 **Methods**

### 404 **Participants**

405 We recruited 39 participants for this study (16 females, 19-35 years old). Five participants were  
406 excluded: one participant did not comply with the task instructions; one was excluded due to a fail-  
407 ure of the eye-tracker calibration; three participants were excluded due to technical issues during  
408 scanning. A total of 34 participants entered the analysis. The study was approved by the regional  
409 committee for medical and health research ethics (project number 2017/969) in Norway and partic-  
410 ipants gave written consent prior to scanning in accordance with the declaration of Helsinki (2008).

### 411 **Task**

412 Participants performed two tasks simultaneously: a smooth pursuit visual-tracking task and a time-  
413 to-contact estimation task. The visual tracking task entailed fixation at a fixation disc that moved on  
414 predefined linear trajectories with one of four speeds: 4.2°/s, 5.8°/s, 7.5°/s and 9.1°/s. Upon reach-  
415 ing the end of such a linear trajectory, the dot stopped moving until the second task was completed.  
416 This second task was a time-to-collision (TTC) estimation task in which participants indicated when  
417 the fixation target would have hit a circular boundary if it had continued moving. This boundary  
418 was a yellow circular line surrounding the target trajectory with 10° radius. Participants gave their  
419 response by pressing a button at the anticipated moment of collision. They performed this task  
420 while still keeping fixation, and the individual linear trajectories were all of the same length (10°  
421 visual angle), leading to four target TTC durations of 1.2s, 0.88s, 0.67s and 0.55s tested in a counter-  
422 balanced fashion across trials. After the button press, participants received feedback for 1 second  
423 informing them about the accuracy of their response. When participants *overestimated* the TTC,  
424 half of the fixation disc closest to the boundary changed color (orange or red) as a function of re-  
425 sponse accuracy (medium or low, respectively). When participants *underestimated* the TTC, half of  
426 the fixation disc further away from the boundary changed color. When participants were accurate,  
427 two opposing quadrants of the fixation disc would turn green. This allowed us to present feedback  
428 at fixation while keeping the number of informative pixels matched across feedback levels. To cal-  
429 ibrate performance feedback across different TTC durations, the precise response window widths  
430 of each feedback level scaled with the speed of the fixation target. The following formula was used  
431 to scale the response window width:  $d \pm ((k * d)/2)$  where  $d$  is the target TTC and  $k$  is a constant  
432 proportional to 0.3 and 0.15 for high and medium accuracy, respectively. This ensured that partici-  
433 pants received approximately the same feedback for tested TTCs despite the known differences in  
434 absolute performance between target TTCs due to inherent scalar variability (Gibbon, 1977). When  
435 no response was given, participants received low-accuracy feedback (two opposing quadrants of  
436 the fixation dot turned red) after a 4 seconds timeout. After the feedback, the disc remained in its  
437 last position for a variable inter-trial interval (ITI) sampled randomly from a uniform distribution  
438 between 0.5 seconds and 1.5 seconds. Following the end of the ITI, the dot continued moving in a  
439 different direction. In the course of 768 trials, each target TTC was sampled 192 times. We sampled  
440 eye-movement directions with 15° resolution, leading to an overall trajectory that was star-shaped,  
441 similar to earlier reports (Nau et al., 2018a). The full trajectory was never explicitly shown to the  
442 participants.

### 443 **Behavioral analysis**

444 Participants indicated the estimated TTC in each trial via button press. In line with previous work  
445 (Jazayeri & Shadlen, 2010), participants tended to overestimate shorter durations and underesti-

446 mate longer durations (Fig. 1B). In order to quantify this behavioral effect we extracted the slope  
447 value of a linear regression line fit between estimated and target TTCs separately for each partici-  
448 pant. A slope of 1 would indicate that participants performed perfectly accurately for all intervals.  
449 A slope of 0 would indicate that participants always gave the same response independent of the  
450 tested interval, fully regressing to the mean of the sampled intervals. Two separate one-tailed  
451 one-sample *t* tests (against 1 or 0) were performed to corroborate that participants' slope values  
452 regressed towards the mean of the sampled TTCs (Fig. S1C). A Spearman's rank-order correla-  
453 tion tested if slope values correlated with the percent of high accuracy trials (Fig. S1D), to further  
454 demonstrate that participants relied to different degrees on both, the target TTCs and the mean  
455 of the sampled TTCs, in order to achieve an optimal performance tradeoff. As a measure of be-  
456 havioral performance, we computed the absolute TTC-error defined as the absolute difference in  
457 estimated and true TTC for each target-TTC level. Participants received feedback after each trial  
458 corresponding to the absolute TTC error of that trial. On average, 46.9% ( $\sigma = 9.1$ ) of trials were of  
459 *high accuracy*, 31.2% ( $\sigma = 3.9$ ) were of *medium* accuracy and 21.1% ( $\sigma = 9.8$ ) were of *low* accuracy  
460 (Fig. 1C). Moreover, we found that this feedback distribution was indeed similar across target-TTC  
461 levels as planned (Fig. S1B). To control that there was no systematic and predictable relationship  
462 between subsequent trials on a behavioral level, we estimated the n-1 Pearson autocorrelation be-  
463 tween feedback values received on each trial and then performed a two-tailed one-sample t-test  
464 on group level against zero using the extracted correlation coefficients from each participant (Fig.  
465 S1A). To further test participants' performance improvements over time, we used a linear mixed-  
466 effects model with run as predictor, absolute TTC-error as the dependent variable and participants  
467 as the error term (Fig. S1E).

## 468 **Imaging data acquisition & preprocessing**

469 Imaging data were acquired on a Siemens 3T MAGNETOM Skyra located at the St. Olavs Hospi-  
470 tal in Trondheim, Norway. A T1-weighted structural scan was acquired with 1mm isotropic voxel  
471 size. Following EPI-parameters were used: voxel size=2mm isotropic, TR=1020ms, TE=34.6ms, flip  
472 angle=55°, multiband factor=6. Participants performed a total of four scanning runs of 16-18 min-  
473 utes each including a short break in the middle of each run. Functional images were corrected for  
474 head motion and co-registered to each individual's structural scan using SPM12 ([www.fil.ion.ucl](http://www.fil.ion.ucl.ac.uk/spm/)  
475 [.ac.uk/spm/](http://www.fil.ion.ucl.ac.uk/spm/)). We used the FSL topup function to correct field distortions based on one image ac-  
476 quired with inverted phase-encoding direction (<https://fsl.fmrib.ox.ac.uk/fsl/fslwiki/topup>).  
477 Functional images were then spatially normalized to the Montreal Neurological Institute (MNI)  
478 brain template and smoothed with a Gaussian kernel with full-width-at-half-maximum of 4 mm  
479 for regions-of-interest analysis or with 8 mm for whole-brain analysis. Time series were high-pass  
480 filtered with a 128 s cut-off period. The results of all voxel-wise analyses were overlaid on a struc-  
481 tural T1-template (colin27) of SPM12 for visualization.

## 482 **Regions of interest definition and analysis**

483 Regions-of-interest masks for different brain areas were generated for each individual participant  
484 based on the automatic parcellation derived from FreeSurfer's structural reconstruction ([https://](https://surfer.nmr.mgh.harvard.edu/)  
485 [surfer.nmr.mgh.harvard.edu/](https://surfer.nmr.mgh.harvard.edu/)). The ROIs used in the present study include the Hippocampus  
486 as main area of interest (Fig. S2A) as well as the Caudate Nucleus, Nucleus Accumbens, Thala-  
487 mus, Putamen, Amygdala and Globus Pallidum (Fig. S2B). The hippocampal ROI was manually seg-  
488 mented following previous reports into its anterior and posterior sections based on the location  
489 of the uncus apex in the coronal plane as a bisection point (Poppenk et al., 2013). We did this be-

490 cause prior work suggested functional differences between anterior and posterior hippocampus  
491 with respect to their contributions to memory-guided behavior (Poppenk et al., 2013). All individual  
492 ROIs were then spatially normalized to the MNI brain template space and re-sliced to the functional  
493 imaging resolution using SPM12. All ROI analyses were conducted using 4mm spatial smoothing.

494 All ROI analyses described in the following were conducted using the following procedure. We  
495 extracted beta estimates estimated for the respective regressors of interest for all voxels within  
496 a region in both hemispheres, averaged them across voxels within that region and hemispheres  
497 and performed one-sample t-tests on group level against zero as implemented in the software R  
498 (<https://www.R-project.org>).

#### 499 **Brain activity as a function of current-trial performance feedback**

500 We used a mass-univariate general linear model to analyze the time courses of all voxels in the brain  
501 as a function of feedback received at the end of each trial. The model included one mean-centered  
502 parametric modulator per run with three levels reflecting the feedback received in each trial. The  
503 feedback itself was a function of TTC error in each trial (high accuracy = 0, medium accuracy = 0.5  
504 and low accuracy = 1). In addition, we added three nuisance regressors per run modeling ITIs,  
505 button presses, and periods of rest. These regressors were convolved with the canonical hemody-  
506 namic response function of SPM12. Moreover, the model included the six realignment parameters  
507 obtained during pre-processing as well as a constant term modeling the mean of the time series.  
508 We estimated weights for all regressors and conducted a t-test against zero using SPM12 for our  
509 feedback regressors of interest on the group level (Fig. 3A). Importantly, positive t-scores indicate  
510 a positive relationship between fMRI activity and TTC error and hence with poor behavioral perfor-  
511 mance. Conversely, negative t-scores indicate a negative relation between the two variables and  
512 hence better behavioral performance.

513 In addition to the voxel-wise whole-brain analyses described above, we conducted independent  
514 ROI analyses for the anterior and posterior sections of the hippocampus (Fig. S2A). Here, we tested  
515 the beta estimates obtained in our first-level analysis for the feedback regressor of interest (Fig. 3B).  
516 See section "Regions of interest definition and analysis" for more details.

#### 517 **Brain activity as a function of trial phase**

518 To examine the relation between brain activity and behavioral performance in a trial in more detail,  
519 we repeated the univariate analysis explained above for each phase of the trial. Three regressors  
520 modelled the main effects of trial phase. Three additional parametric regressors modeled the feed-  
521 back effect on the activity during the tracking phase, the TTC estimation phase and the feedback  
522 phase in one GLM. In addition, we again added regressors modeling the ITI's, button presses and  
523 periods of rest to the model as well as head-motion regressors and a constant term as before. Each  
524 run was modeled separately. On the group-level, we again used SPM12 to perform t-tests against  
525 zero using the weights estimated for the feedback regressors of interest for each trial phase (Fig.  
526 S3).

#### 527 **Brain activity as a function of performance feedback on the previous trial**

528 To examine how feedback modulates activity in the subsequent trial, we used a GLM analysis to  
529 model the activity of each voxel and trial as a function of feedback received in the previous trial. The  
530 GLM included three regressors modeling the feedback levels, one for ITIs, one for button presses  
531 and one for periods of rest, which were all convolved with the canonical hemodynamic response



532 function of SPM12. In addition, the realignment parameters and a constant term were again added.  
533 On the group level, we then contrasted the weights obtained for the low error vs. high error re-  
534 gressors and tested for differences using t-tests implemented in SPM12 (Fig. 2A).

535 Additionally, we again conducted ROI analyses for the anterior and posterior sections of the hip-  
536 pocampus (Fig. S2A) following the same procedure as described earlier (section "Regions of interest  
537 definition and analysis"). Here, we tested beta estimates obtained in the first-level analysis for the  
538 feedback-in-previous-trial regressor of interest (Fig. 2B).

### 539 **Hippocampal functional connectivity as a function of previous-trial performance feedback**

540 We conducted a psychophysiological interactions (PPI) analysis to examine whether hippocampal  
541 functional connectivity with the rest of the brain depended on the participant's performance on  
542 the previous trial. To do so, we centered a sphere onto the group-level peak effects within the  
543 HPC using main-effect GLM described in the previous section. The sphere was 4mm in radius  
544 and was centered on the following MNI coordinates:  $x=-32$ ,  $y=-14$ ,  $z=-14$ . The GLM included a PPI  
545 regressor, a nuisance regressor accounting for the main effect of past-trial performance, and a  
546 nuisance regressor explaining variance due to inherent physiological signal correlations between  
547 the HPC and the rest of the brain. The PPI regressor was an interaction term containing the element-  
548 by-element product of the task time course (effects due to past-trial performance) and the HPC  
549 spherical seed ROI time course. The estimated beta weight corresponding to the interaction term  
550 was then tested against zero on the group-level using a t-test implemented in SPM12 (Fig. 2C). This  
551 revealed brain areas whose activity was co-varying with the hippocampus seed ROI as a function  
552 of past-trial performance ( $n-1$ ).

### 553 **Brain activity as a function of improvements in behavioral performance across trials**

554 We used a GLM to analyze activity changes associated with behavioral improvements across tri-  
555 als. One regressor modelled the main effect of the trial and two parametric regressors modeled  
556 the following contrasts: trials in which behavioral performance improved vs. trials in which behav-  
557 ioral performance did not improve or got worse relative to the previous trial. These regressors  
558 modeled the behavioral improvements either relative to the previous trial, and therefore indepen-  
559 dently of TTC (likely serving generalization), or relative to the previous trial in which the same target  
560 TTC was presented (likely serving specificity). These two regressors reflect the tests for target-TTC-  
561 generalized and target-TTC-specific learning, respectively. Improvement in performance was de-  
562 fined as receiving feedback of higher valence than in the corresponding previous trial. The same  
563 nuisance regressors were added as in the other GLMs and all regressors except the realignment  
564 parameters and the constant term were convolved with the canonical hemodynamic response func-  
565 tion of SPM12. On the group level, we tested the two parametric regressors of interest against zero  
566 using a t-test implemented in SPM12, effectively contrasting trials in which behavioral performance  
567 improved against trials in which behavioral performance did not improve or got worse relative to  
568 the respective previous trials (Fig. 4A). All runs were modeled separately.

569 Moreover, we again conducted ROI analyses for the anterior and posterior sections of the hip-  
570 pocampus (Fig. S2A) following the same procedure as described earlier (see section "Regions of  
571 interest definition and analysis"). Here, we tested beta estimates obtained in the first-level analy-  
572 sis for the TTC-specific and TTC-generalized learning regressors using one-tailed one-sample t-tests  
573 (Fig. 4B). In addition, to test which specific subcortical regions were involved in these processes, we  
574 conducted post-hoc ROI analyses for subcortical regions after the whole-brain results were known

575 (Fig. S4B; one-tailed one-sample  $t$  tests; TTC-specific: caudate:  $t(33) = 5.95, p = 5.6 \times 10^{-7}, p_{fwe} =$   
576  $3.4 \times 10^{-6}, d = 1.02, CI : [0.61, 1.45]$ , nucleus accumbens:  $t(33) = 4.41, p = 5.2 \times 10^{-5}, p_{fwe} = 3.1 \times 10^{-4}, d =$   
577  $0.76, CI : [0.38, 1.15]$ , globus pallidus:  $t(33) = 7.05, 2.3 \times 10^{-8}, p_{fwe} = 1.4 \times 10^{-7}, d = 1.21, CI : [0.77, 1.67]$ ,  
578 putamen:  $t(33) = 8.07, p = 1.3 \times 10^{-9}, p_{fwe} = 7.7 \times 10^{-9}, d = 1.38, CI : [0.92, 1.88]$ , amygdala:  $t(33) = 1.78, p =$   
579  $0.042, p_{fwe} = 0.255, d = 0.30, CI : [-0.04, 0.66]$ , thalamus:  $t(33) = 2.61, p = 0.007, p_{fwe} = 0.007, d = 0.45, CI :$   
580  $[0.09, 0.81]$ ; TTC-generalized: caudate:  $t(33) = -0.67, p = 0.746, p_{fwe} = 1, d = -0.11, CI : [-0.46, 0.23]$ , nu-  
581 cleus accumbens:  $t(33) = 1.82, p = 0.039, p_{fwe} = 0.235, d = 0.31, CI : [-0.04, 0.66]$ , globus pallidus:  $t(33) =$   
582  $7.06, p = 2.2 \times 10^{-8}, p_{fwe} = 1.3 \times 10^{-7}, d = 1.21, CI : [0.77, 1.68]$ , putamen:  $t(33) = 6.21, p = 2.6 \times 10^{-7}, p_{fwe} =$   
583  $1.6 \times 10^{-6}, d = 1.06, CI : [0.65, 1.50]$ , amygdala:  $t(33) = 4.25, p = 8.3 \times 10^{-5}, p_{fwe} = 4.9 \times 10^{-4}, d = 0.73, CI :$   
584  $[0.35, 1.12]$ , thalamus:  $t(33) = 4.05, p = 1.5 \times 10^{-4}, p_{fwe} = 8.9 \times 10^{-4}, d = 0.69, CI : [0.32, 1.08]$ ). The subcorti-  
585 cal ROIs (Fig. S2B) were based on the FreeSurfer parcellation as described in the section "Regions  
586 of interest definition and analysis".

### 587 Hippocampal functional connectivity as a function of TTC-generalized learning

588 To examine which brain regions whose activity co-fluctuated with the one of the hippocampus dur-  
589 ing TTC-generalized learning, we again conducted a PPI analysis similar to the one described earlier.  
590 A spherical seed ROI with a radius of 4 mm was centered around the hippocampal group-level peak  
591 effect ( $x=-30, y=-24, z=-18$ ) observed for the TTC-generalized learning regressor described above.  
592 The GLM included a PPI regressor and two nuisance regressors accounting for task-related effects  
593 from our contrast of interest (Behavioral improvements vs. no behavioral improvements) as well  
594 as physiological correlations that could arise due to anatomical connections to the hippocampal  
595 seed region or shared subcortical input. On the group-level, we then tested the weights estimated  
596 for our PPI regressor of interest against zero using a  $t$ -test implemented in SPM12. This revealed  
597 areas whose activity co-fluctuated with the one of the hippocampus as a function TTC-generalized  
598 feedback learning (Fig. S5A).

599 Moreover, we conducted independent ROI analyses for subcortical regions as described in the  
600 section "Regions of interest definition and analysis". Here, we tested the beta estimates obtained  
601 for the hippocampal seed-based PPI regressor of interest (Fig. S5B; one-tailed one-sample  $t$  tests:  
602 caudate:  $t(33) = 1.06, p = 0.149, p_{fwe} = 0.894, d = 0.18, CI : [-0.16, 0.53]$ , putamen:  $t(33) = 2.79, p =$   
603  $0.004, p_{fwe} = 0.026, d = 0.48, CI : [0.12, 0.84]$ , globus pallidus:  $t(33) = 2.52, p = 0.008, p_{fwe} = 0.050, d =$   
604  $0.43, CI : [0.08, 0.79]$ , amygdala:  $t(33) = 2.60, p = 0.007, p_{fwe} = 0.041, d = 0.45, CI : [0.09, 0.81]$ , nucleus  
605 accumbens:  $t(33) = -1.14, p = 0.869, p_{fwe} = 1, d = -0.20, CI : [-0.54, 0.15]$ , thalamus:  $t(33) = 2.71, p =$   
606  $0.005, p_{fwe} = 0.032, d = 0.46, CI : [0.11, 0.83]$ ).

### 607 Brain activity as a function of behavioral performance and as a function of the behavioral 608 regression effect

609 To examine the neural underpinnings governing specificity and generalization in timing behavior in  
610 detail, we analyzed the trial-wise activity of each voxel as a function of performance in the TTC task  
611 (i.e. the difference between estimated and true TTC in each trial) and as a function of the regression  
612 effect in behavior (i.e. the difference between the estimated TTC and the mean of the sampled  
613 intervals, which was 0.82 s). To avoid effects of potential co-linearity between these regressors, we  
614 estimated model weights using two independent GLMs, which modeled the time course of each  
615 trial with either one of the two regressors. In addition, we again accounted for nuisance variance  
616 as described before, and all regressors except the realignment parameters and the constant term  
617 were convolved with the canonical HRF of SPM12. After fitting the model, we used the weights  
618 estimated for the two regressors to perform voxel-wise F-tests using SPM12, revealing activity that

619 was correlated with these two regressors independent of the sign of the correlation (Fig. 5A). In  
620 addition, we again performed ROI analyses using two-tailed one-sample t-tests for the anterior and  
621 posterior hippocampus (Figs. S2A, 5B).

### 622 **Eye tracking: Fixation quality does not affect the interpretation of our results**

623 We used an MR-compatible infrared eye tracker with long-range optics (Eyelink 1000) to monitor  
624 gaze position at a rate of 500 hz during the experiment. After blink removal, the eye tracking data  
625 was linearly detrended, median centered, downsampled to the screen refresh rate of 120 hz and  
626 smoothed with a running-average kernel of 100 ms. Kruskal-Wallis tests were used in order to test  
627 for potential biases in fixation error across speeds (Fig. S6A) or across feedback levels (Fig. S6B).  
628 Moreover, we tested if differences in fixation error could either explain individual differences in  
629 the regression effect, or individual differences in absolute TTC error in behavior using Spearman's  
630 rank-order correlations (Fig. S6C).

## 631 References

- 632 Acerbi, L., Wolpert, D. M., & Vijayakumar, S. (2012). Internal Representations of Temporal Statistics and Feedback Calibrate Motor-  
633 Sensory Interval Timing. *PLoS Computational Biology*, 8(11), e1002771. doi: 10.1371/journal.pcbi.1002771
- 634 Aly, M., & Turk-Browne, N. B. (2017). How hippocampal memory shapes, and is shaped by, attention. In D. E. Hannula & M. C. Duff  
635 (Eds.), *The hippocampus from cells to systems: Structure, connectivity, and functional contributions to memory and flexible cognition* (pp.  
636 369–403). Cham: Springer International Publishing. doi: 10.1007/978-3-319-50406-3\_12
- 637 Barnett, A. J., O'Neil, E. B., Watson, H. C., & Lee, A. C. (2014). The human hippocampus is sensitive to the durations of events and  
638 intervals within a sequence. *Neuropsychologia*, 64, 1–12. doi: 10.1016/j.neuropsychologia.2014.09.011
- 639 Behrens, T. E., Muller, T. H., Whittington, J. C., Mark, S., Baram, A. B., Stachenfeld, K. L., & Kurth-Nelson, Z. (2018). What Is a Cognitive  
640 Map? Organizing Knowledge for Flexible Behavior. *Neuron*, 100(2), 490–509. doi: 10.1016/j.neuron.2018.10.002
- 641 Bellmund, J., Deuker, L., Montijn, N. D., & Doeller, C. F. (2021). *Structuring time: The hippocampus constructs sequence memories that*  
642 *generalize temporal relations across experiences* (preprint). bioRxiv. doi: 10.1101/2021.04.23.440002
- 643 Bellmund, J., Polti, I., & Doeller, C. F. (2020). Sequence memory in the hippocampal–entorhinal region. *Journal of Cognitive Neuroscience*,  
644 32(11), 2056–2070. doi: 10.1162/jocn\_a\_01592
- 645 Bicanski, A., & Burgess, N. (2020, September). Neuronal vector coding in spatial cognition. *Nature Reviews Neuroscience*, 21(9), 453–470.  
646 Retrieved 2021-10-22, from <https://www.nature.com/articles/s41583-020-0336-9> doi: 10.1038/s41583-020-0336-9
- 647 Bostan, A. C., & Strick, P. L. (2018). The basal ganglia and the cerebellum: Nodes in an integrated network. *Nature Reviews Neuroscience*,  
648 19(6), 338–350. doi: 10.1038/s41583-018-0002-7
- 649 Burgess, N., Maguire, E., & O'Keefe, J. (2002). The Human Hippocampus and Spatial and Episodic Memory. *Neuron*, 35(4), 625–641.  
650 doi: [https://doi.org/10.1016/S0896-6273\(02\)00830-9](https://doi.org/10.1016/S0896-6273(02)00830-9)
- 651 Chang, C. J., & Jazayeri, M. (2018). Integration of speed and time for estimating time to contact. *Proceedings of the National Academy of*  
652 *Sciences of the United States of America*, 115(12), E2879–E2887. doi: 10.1073/pnas.1713316115
- 653 Cheng, D. T., Disterhoft, J. F., Power, J. M., Ellis, D. A., & Desmond, J. E. (2008). Neural substrates underlying human delay and trace  
654 eyeblink conditioning. *Proceedings of the National Academy of Sciences of the United States of America*, 105(23), 8108–8113. doi:  
655 10.1073/pnas.0800374105
- 656 Chersi, F., & Burgess, N. (2015). The Cognitive Architecture of Spatial Navigation: Hippocampal and Striatal Contributions. *Neuron*,  
657 88(1), 64–77. doi: 10.1016/j.neuron.2015.09.021
- 658 Cicchini, G. M., Arrighi, R., Cecchetti, L., Giusti, M., & Burr, D. C. (2012). Optimal Encoding of Interval Timing in Expert Percussionists.  
659 *Journal of Neuroscience*, 32(3), 1056–1060. doi: 10.1523/JNEUROSCI.3411-11.2012
- 660 Cohen, M. X., & Ranganath, C. (2007). Reinforcement learning signals predict future decisions. *Journal of Neuroscience*, 27(2), 371–378.  
661 doi: 10.1523/JNEUROSCI.4421-06.2007
- 662 Cox, J., & Witten, I. B. (2019). Striatal circuits for reward learning and decision-making. *Nature Reviews Neuroscience*, 20(8), 482–494.  
663 doi: 10.1038/s41583-019-0189-2
- 664 Daw, N. D., & Dayan, P. (2014). The algorithmic anatomy of model-based evaluation. *Philosophical Transactions of the Royal Society B:*  
665 *Biological Sciences*, 369(1655), 20130478. doi: 10.1098/rstb.2013.0478
- 666 de Azevedo Neto, R. M., & Amaro Júnior, E. (2018). Bilateral dorsal fronto-parietal areas are associated with integration of visual  
667 motion information and timed motor action. *Behavioural Brain Research*, 337, 91–98. doi: 10.1016/j.bbr.2017.09.046
- 668 Deuker, L., Bellmund, J., Navarro Schröder, T., & Doeller, C. F. (2016). An event map of memory space in the hippocampus. *eLife*, 5,  
669 e16534. doi: 10.7554/eLife.16534
- 670 Dickerson, K. C., & Delgado, M. R. (2015). Contributions of the hippocampus to feedback learning. *Cognitive, Affective, & Behavioral*  
671 *Neuroscience*, 15(4), 861–877. doi: 10.3758/s13415-015-0364-5
- 672 Doeller, C. F., King, J. A., & Burgess, N. (2008). Parallel striatal and hippocampal systems for landmarks and boundaries in spatial  
673 memory. *Proceedings of the National Academy of Sciences of the United States of America*, 105(15), 5915–5920. doi: 10.1073/pnas  
674 .0801489105
- 675 Eichenbaum, H. (2014). Time cells in the hippocampus: A new dimension for mapping memories. *Nature Reviews Neuroscience*, 15(11),  
676 732–744. doi: 10.1038/nrn3827
- 677 Eichenbaum, H. (2017). On the Integration of Space, Time, and Memory. *Neuron*, 95(5), 1007–1018. doi: 10.1016/j.neuron.2017.06.036
- 678 Epstein, R. A., & Baker, C. I. (2019). Scene Perception in the Human Brain. *Annual Review of Vision Science*, 5(1), 373–397. doi: 10.1146/  
679 annurev-vision-091718-014809
- 680 Foerde, K., & Shohamy, D. (2011). Feedback timing modulates brain systems for learning in humans. *Journal of Neuroscience*, 31(37),  
681 13157–13167. doi: 10.1523/JNEUROSCI.2701-11.2011
- 682 Friston, K., FitzGerald, T., Rigoli, F., Schwartenbeck, P., & Pezzulo, G. (2016). Active inference: a process theory. *Neural Computation*,  
683 29(1), 1–49. doi: 10.1162/NECO\_a\_00912

- 684 Gahnstrom, C. J., & Spiers, H. J. (2020). Striatal and hippocampal contributions to flexible navigation in rats and humans. *Brain and*  
685 *Neuroscience Advances*, 4, 239821282097977. doi: 10.1177/2398212820979772
- 686 Gauthier, B., Pestke, K., & van Wassenhove, V. (2019). Building the Arrow of Time... Over Time: A Sequence of Brain Activity Mapping  
687 Imagined Events in Time and Space. *Cerebral Cortex*, 29(10), 4398–4414. doi: 10.1093/cercor/bhy320
- 688 Gauthier, B., Prabhu, P., Kotegar, K. A., & van Wassenhove, V. (2020). Hippocampal contribution to ordinal psychological time in the  
689 human brain. *Journal of Cognitive Neuroscience*, 32(11), 2071–2086. doi: 10.1162/jocn\_a\_01586
- 690 Geerts, J. P., Chersi, F., Stachenfeld, K. L., & Burgess, N. (2020). A general model of hippocampal and dorsal striatal learning and  
691 decision making. *Proceedings of the National Academy of Sciences of the United States of America*, 117(49), 31427–31437. doi: 10.1073/  
692 pnas.2007981117
- 693 Gershman, S. J., Moustafa, A. A., & Ludvig, E. A. (2014). Time representation in reinforcement learning models of the basal ganglia.  
694 *Frontiers in Computational Neuroscience*, 7(JAN). doi: 10.3389/fncom.2013.00194
- 695 Gibbon, J. (1977). Scalar expectancy theory and Weber's law in animal timing. *Psychological Review*, 84(3), 279–325. doi: 10.1037/  
696 0033-295X.84.3.279
- 697 Goodroe, S. C., Starnes, J., & Brown, T. I. (2018). The Complex Nature of Hippocampal-Striatal Interactions in Spatial Navigation.  
698 *Frontiers in Human Neuroscience*, 12. doi: 10.3389/fnhum.2018.00250
- 699 Gouvêa, T. S., Monteiro, T., Motiwala, A., Soares, S., Machens, C., & Paton, J. J. (2015). Striatal dynamics explain duration judgments.  
700 *eLife*, 4(December2015), e11386. doi: 10.7554/eLife.11386
- 701 Howard, M. W. (2017). Temporal and spatial context in the mind and brain. *Current Opinion in Behavioral Sciences*, 17, 14–19. doi:  
702 10.1016/j.cobeha.2017.05.022
- 703 Huang, Y., & Rao, R. P. (2011). Predictive coding. *Wiley Interdisciplinary Reviews: Cognitive Science*, 2(5), 580–593. doi: 10.1002/wcs.142
- 704 Jazayeri, M., & Shadlen, M. N. (2010). Temporal context calibrates interval timing. *Nature Neuroscience*, 13(8), 1020–1026. doi: 10.1038/  
705 nn.2590
- 706 Kaplan, R., Schuck, N. W., & Doeller, C. F. (2017). The Role of Mental Maps in Decision-Making. *Trends in Neurosciences*, 40(5), 256–259.  
707 doi: 10.1016/j.tins.2017.03.002
- 708 Kragel, J. E., Schuele, S., VanHaerents, S., Rosenow, J. M., & Voss, J. L. (2021). Rapid coordination of effective learning by the human  
709 hippocampus. *Science Advances*, 7(25). doi: 10.1126/sciadv.abf7144
- 710 Kumaran, D. (2012). What representations and computations underpin the contribution of the hippocampus to generalization and  
711 inference? *Frontiers in Human Neuroscience*, 6. doi: 10.3389/fnhum.2012.00157
- 712 Lee, D., Seo, H., & Jung, M. W. (2012). Neural basis of reinforcement learning and decision making. *Annual Review of Neuroscience*, 35,  
713 287–308. doi: 10.1146/annurev-neuro-062111-150512
- 714 LeGates, T. A., Kvarta, M. D., Tooley, J. R., Francis, T. C., Lobo, M. K., Creed, M. C., & Thompson, S. M. (2018). Reward behaviour is  
715 regulated by the strength of hippocampus–nucleus accumbens synapses. *Nature*, 564(7735), 258–262. doi: 10.1038/s41586-018  
716 -0740-8
- 717 MacDonald, C. J., Lepage, K. Q., Eden, U. T., & Eichenbaum, H. (2011). Hippocampal "time cells" bridge the gap in memory for discon-  
718 tinuous events. *Neuron*, 71(4), 737–749. doi: 10.1016/j.neuron.2011.07.012
- 719 Meck, W. H., Church, R. M., & Olton, D. S. (1984). Hippocampus, time, and memory. *Behavioral Neuroscience*, 98(1), 3–22. doi:  
720 10.1037/0735-7044.98.1.3
- 721 Mello, G. B., Soares, S., & Paton, J. J. (2015). A scalable population code for time in the striatum. *Current Biology*, 25(9), 1113–1122. doi:  
722 10.1016/j.cub.2015.02.036
- 723 Momennejad, I. (2020). Learning Structures: Predictive Representations, Replay, and Generalization. *Current Opinion in Behavioral*  
724 *Sciences*, 32, 155–166. doi: 10.1016/j.cobeha.2020.02.017
- 725 Montchal, M. E., Reagh, Z. M., & Yassa, M. A. (2019). Precise temporal memories are supported by the lateral entorhinal cortex in  
726 humans. *Nature Neuroscience*, 22(2), 284–288. doi: 10.1038/s41593-018-0303-1
- 727 Nau, M., Julian, J. B., & Doeller, C. F. (2018). How the Brain's Navigation System Shapes Our Visual Experience. *Trends in Cognitive*  
728 *Sciences*, 22(9), 810–825. doi: 10.1016/j.tics.2018.06.008
- 729 Nau, M., Navarro Schröder, T., Bellmund, J., & Doeller, C. F. (2018a). Hexadirectional coding of visual space in human entorhinal cortex.  
730 *Nature Neuroscience*, 21(2), 188–190. doi: 10.1038/s41593-017-0050-8
- 731 Nobre, A. C., & van Ede, F. (2018). Anticipated moments: temporal structure in attention. *Nature Reviews Neuroscience*, 19(1). doi:  
732 10.1038/nrn.2017.141
- 733 Palombo, D. J., & Verfaellie, M. (2017). Hippocampal contributions to memory for time: evidence from neuropsychological studies.  
734 *Current Opinion in Behavioral Sciences*, 17, 107–113. doi: 10.1016/j.cobeha.2017.07.015
- 735 Paton, J. J., & Buonomano, D. V. (2018). The Neural Basis of Timing: Distributed Mechanisms for Diverse Functions. *Neuron*, 98(4),  
736 687–705. doi: 10.1016/j.neuron.2018.03.045

- 737 Peer, M., Brunec, I. K., Newcombe, N. S., & Epstein, R. A. (2021). Structuring Knowledge with Cognitive Maps and Cognitive Graphs.  
738 *Trends in Cognitive Sciences*, 25(1), 37–54. doi: 10.1016/j.tics.2020.10.004
- 739 Petter, E. A., Gershman, S. J., & Meck, W. H. (2018). Integrating Models of Interval Timing and Reinforcement Learning. *Trends in*  
740 *Cognitive Sciences*, 22(10), 911–922. doi: 10.1016/j.tics.2018.08.004
- 741 Petzschner, F. H., & Glasauer, S. (2011). Iterative Bayesian Estimation as an Explanation for Range and Regression Effects: A Study on  
742 Human Path Integration. *Journal of Neuroscience*, 31(47), 17220–17229. doi: 10.1523/JNEUROSCI.2028-11.2011
- 743 Petzschner, F. H., Glasauer, S., & Stephan, K. E. (2015). A Bayesian perspective on magnitude estimation. *Trends in Cognitive Sciences*,  
744 19(5), 285–293. doi: 10.1016/j.tics.2015.03.002
- 745 Poppenk, J., Evensmoen, H. R., Moscovitch, M., & Nadel, L. (2013). Long-axis specialization of the human hippocampus. *Trends in*  
746 *Cognitive Sciences*, 17(5), 230–240. doi: 10.1016/j.tics.2013.03.005
- 747 Rakitin, B. C., Penney, T. B., Gibbon, J., Malapani, C., Hinton, S. C., & Meck, W. H. (1998). Scalar expectancy theory and peak-interval  
748 timing in humans. *Journal of Experimental Psychology: Animal Behavior Processes*, 24(1), 15–33. doi: 10.1037/0097-7403.24.1.15
- 749 Richards, W. (1973). Time reproductions by H.M. *Acta Psychologica*, 37(4), 279–282. doi: 10.1016/0001-6918(73)90020-6
- 750 Roach, N. W., McGraw, P. V., Whitaker, D. J., & Heron, J. (2017). Generalization of prior information for rapid Bayesian time estimation.  
751 *Proceedings of the National Academy of Sciences*, 114(2). doi: 10.1073/pnas.1610706114
- 752 Schapiro, A. C., Turk-Browne, N. B., Botvinick, M. M., & Norman, K. A. (2017). Complementary learning systems within the hippocampus:  
753 a neural network modelling approach to reconciling episodic memory with statistical learning. *Philosophical Transactions of the Royal*  
754 *Society B: Biological Sciences*, 372(1711), 20160049. doi: 10.1098/rstb.2016.0049
- 755 Schiller, D., Eichenbaum, H., Buffalo, E. A., Davachi, L., Foster, D. J., Leutgeb, S., & Ranganath, C. (2015). Memory and space: Towards  
756 an understanding of the cognitive map. *Journal of Neuroscience*, 35(41), 13904–13911. doi: 10.1523/JNEUROSCI.2618-15.2015
- 757 Schlichting, M. L., & Preston, A. R. (2015). Memory integration: neural mechanisms and implications for behavior. *Current Opinion in*  
758 *Behavioral Sciences*, 1, 1–8. doi: 10.1016/j.cobeha.2014.07.005
- 759 Schönberg, T., Daw, N. D., Joel, D., & O’Doherty, J. P. (2007). Reinforcement learning signals in the human striatum distinguish learners  
760 from nonlearners during reward-based decision making. *Journal of Neuroscience*, 27(47), 12860–12867. doi: 10.1523/JNEUROSCI  
761 .2496-07.2007
- 762 Schuck, N. W., & Niv, Y. (2019). Sequential replay of nonspatial task states in the human hippocampus. *Science*, 364(6447). doi:  
763 10.1126/science.aaw5181
- 764 Shikano, Y., Ikegaya, Y., & Sasaki, T. (2021). Minute-encoding neurons in hippocampal-striatal circuits. *Current Biology*, 0(0), 1438-  
765 1449.e6. doi: 10.1016/j.cub.2021.01.032
- 766 Shimbo, A., Izawa, E.-I., & Fujisawa, S. (2021). Scalable representation of time in the hippocampus. *Science Advances*, 7(6), eabd7013.  
767 doi: 10.1126/sciadv.abd7013
- 768 Shohamy, D., & Wagner, A. D. (2008). Integrating Memories in the Human Brain: Hippocampal-Midbrain Encoding of Overlapping  
769 Events. *Neuron*, 60(2), 378–389. doi: 10.1016/j.neuron.2008.09.023
- 770 Thavabalasingam, S., O’Neil, E. B., & Lee, A. C. (2018). Multivoxel pattern similarity suggests the integration of temporal duration in  
771 hippocampal event sequence representations. *NeuroImage*, 178, 136–146. doi: 10.1016/j.neuroimage.2018.05.036
- 772 Thavabalasingam, S., O’Neil, E. B., Tay, J., Nestor, A., & Lee, A. C. (2019). Evidence for the incorporation of temporal duration information  
773 in human hippocampal long-term memory sequence representations. *Proceedings of the National Academy of Sciences of the United*  
774 *States of America*, 116(13), 6407–6414. doi: 10.1073/pnas.1819993116
- 775 Umbach, G., Katak, P., Jacobs, J., Kahana, M., Pfeiffer, B. E., Sperling, M., & Lega, B. (2020). Time cells in the human hippocampus and  
776 entorhinal cortex support episodic memory. *Proceedings of the National Academy of Sciences of the United States of America*, 117(45),  
777 28463–28474. doi: 10.1073/pnas.2013250117
- 778 Vikbladh, O. M., Meager, M. R., King, J., Blackmon, K., Devinsky, O., Shohamy, D., ... Daw, N. D. (2019). Hippocampal Contributions to  
779 Model-Based Planning and Spatial Memory. *Neuron*, 102(3), 683–693.e4. doi: 10.1016/j.neuron.2019.02.014
- 780 Wang, J., Narain, D., Hosseini, E. A., & Jazayeri, M. (2018). Flexible timing by temporal scaling of cortical responses. *Nature Neuroscience*,  
781 21(1), 102–112. doi: 10.1038/s41593-017-0028-6
- 782 Whittington, J. C. R., Muller, T. H., Mark, S., Chen, G., Barry, C., Burgess, N., & Behrens, T. E. J. (2020). The Tolman-Eichenbaum  
783 Machine: Unifying Space and Relational Memory through Generalization in the Hippocampal Formation. *Cell*, 183(5). doi: 10.1016/  
784 j.cell.2020.10.024
- 785 Wiener, M., Michaelis, K., & Thompson, J. C. (2016). Functional correlates of likelihood and prior representations in a virtual distance  
786 task. *Human Brain Mapping*, 37(9), 3172–3187. doi: 10.1002/hbm.23232
- 787 Wikenheiser, A. M., Marrero-Garcia, Y., & Schoenbaum, G. (2017). Suppression of Ventral Hippocampal Output Impairs Integrated  
788 Orbitofrontal Encoding of Task Structure. *Neuron*, 95(5), 1197–1207.e3. doi: 10.1016/j.neuron.2017.08.003
- 789 Wimmer, G. E., Daw, N. D., & Shohamy, D. (2012). Generalization of value in reinforcement learning by humans. *European Journal of*  
790 *Neuroscience*, 35(7), 1092–1104. doi: 10.1111/j.1460-9568.2012.08017.x

- 791 Wirth, S., Avsar, E., Chiu, C. C., Sharma, V., Smith, A. C., Brown, E., & Suzuki, W. A. (2009). Trial Outcome and Associative Learning  
792 Signals in the Monkey Hippocampus. *Neuron*, *61*(6), 930–940. doi: 10.1016/j.neuron.2009.01.012
- 793 Wittmann, B. C., Schott, B. H., Guderian, S., Frey, J. U., Heinze, H. J., & Düzel, E. (2005). Reward-related fMRI activation of dopaminergic  
794 midbrain is associated with enhanced hippocampus-dependent long-term memory formation. *Neuron*, *45*(3), 459–467. doi: 10  
795 .1016/j.neuron.2005.01.010
- 796 Wolpert, D. M., Diedrichsen, J., & Flanagan, J. R. (2011). Principles of sensorimotor learning. *Nature Reviews Neuroscience*, *12*(12),  
797 739–751. doi: 10.1038/nrn3112
- 798 Yin, B., & Troger, A. B. (2011). Exploring the 4th dimension: Hippocampus, time, and memory revisited. *Frontiers in Integrative*  
799 *Neuroscience*, *5*. doi: 10.3389/fnint.2011.00036

800 **Supplementary Material**

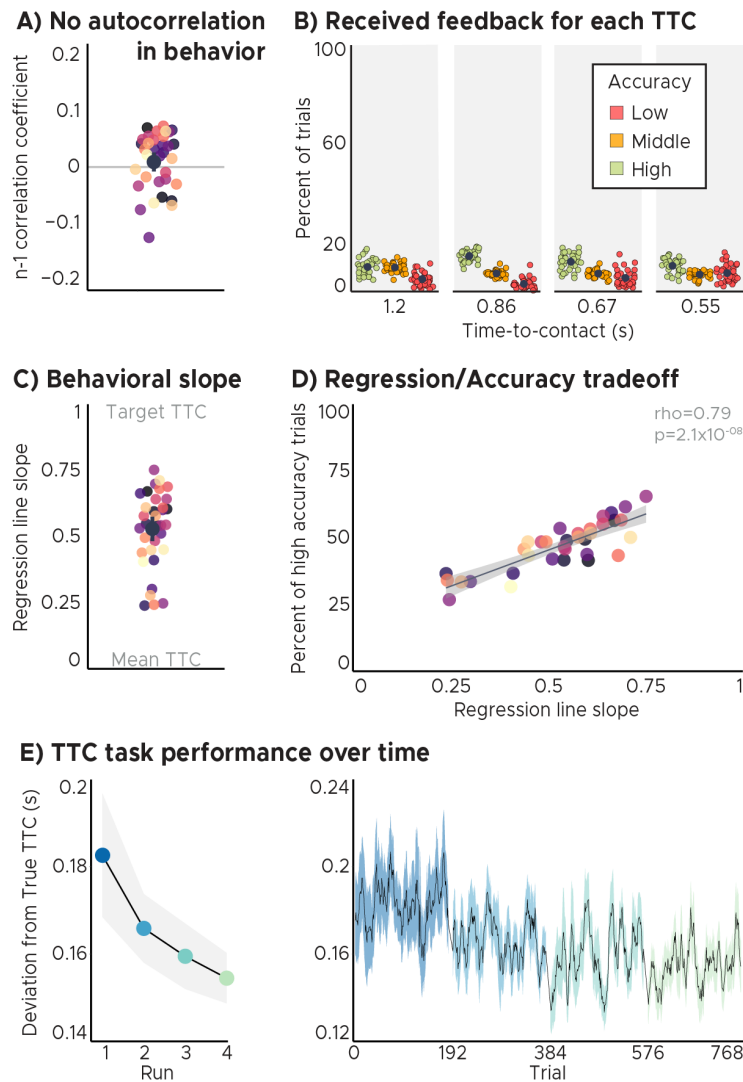

**Figure S1: Behavioral analyses.** A) No autocorrelation in the behavioral feedback over trials. The feedback in one trial did not predict feedback in the following trial. Displayed values correspond to the Pearson  $n-1$  correlation coefficient. B) Feedback distributions for all speed levels. Participants received approximately the same feedback for all speed levels/target TTCs. C) Behavioral regression effect. We plot linear regression-line slopes predicting estimated TTCs as a function of target TTCs for each participant. A slope of 1 indicates perfect performance. A slope of 0 indicates that participants always gave the same response independent of the target TTC. We found that the slope coefficients clustered at around 0.5, suggesting that participants' responses were biased towards the mean of the sampled intervals. ABC) Depicted are the mean and SEM across participants (black dot and line) overlaid on single participant data (dots). D) Performance trade-off between the regression effect and TTC accuracy. Participants with higher TTC accuracy exhibited a weaker regression effect, reflected in larger regression-line slopes (same data as in C). Each dot represents a single participant. Regression line (black) and SEM (gray shade) were added. ACD) Participants were color coded. E) TTC task performance over time. Left panel: Across-trial-average performance over scanning runs. Right panel: task performance over trials. We plot the mean (black line) and SEM (shaded area) across participants. Run identity color coded. Participants' task performance improved over time.



### A) Hippocampal regions of interest

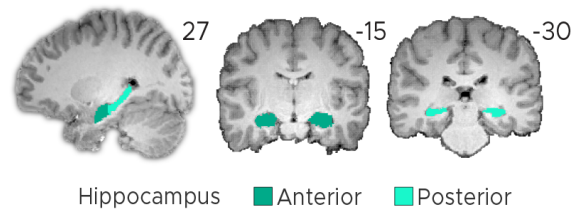

### B) Subcortical regions of interest

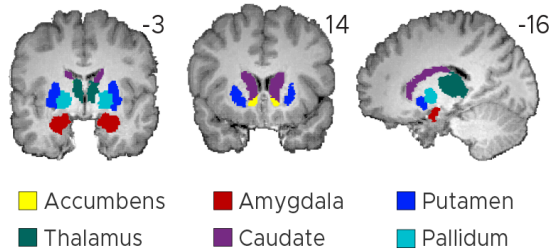

**Figure S2: Regions of interest (ROIs). A) Anterior and posterior hippocampal ROIs. B) Subcortical regions-of-interest (ROIs) for the nucleus accumbens, the amygdala, the thalamus, the caudate, the putamen and the pallidum. AB) ROIs shown for a sample participant superimposed onto the skull-stripped structural T1-scan of that participant. These masks were created using FreeSurfer's cortical and subcortical parcellation.**

### Trial-phase specific relationship between brain activity & behavior

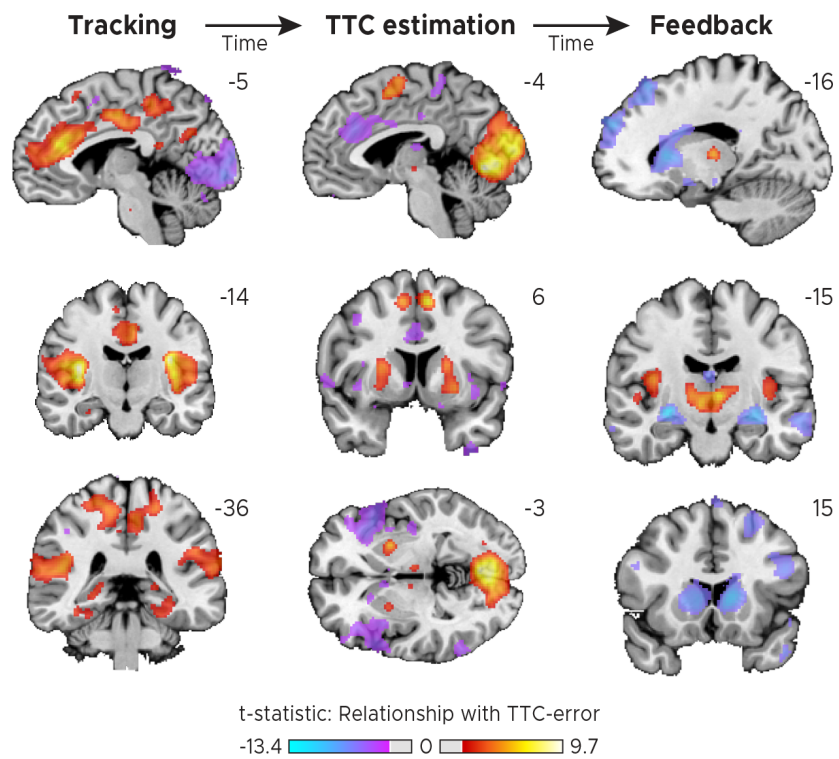

**Figure S3: Trial-phase specific relationship between brain activity and behavior.** We repeated the voxel-wise mass-univariate general linear model analysis for performance in the current trial (Fig. 2) for each of the three trial phases individually. This included the tracking phase (in which the fixation target moved), the TTC-estimation phase (in which the fixation target had stopped and participants estimated the TTC) and the feedback phase (in which participants received feedback about how accurately they had estimated the TTC). We plot thresholded t-test results at 1mm resolution overlaid on a structural template brain. Positive t-scores indicate a positive relationship between brain activity and TTC-error.

## A) Distinct networks update duration-specific or generalized task information

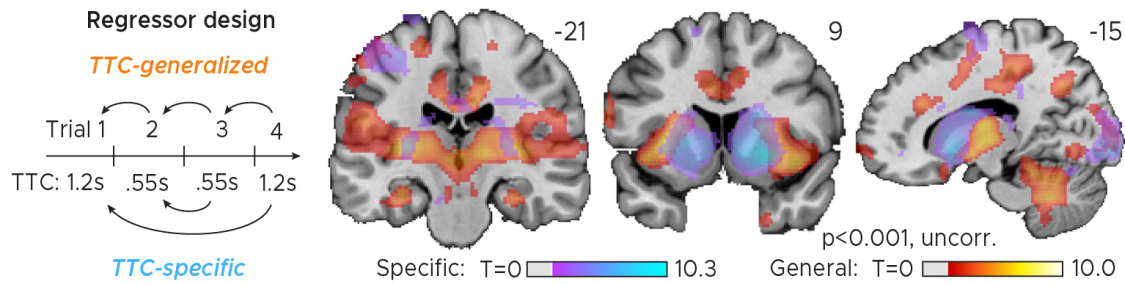

## B) Subcortical regions

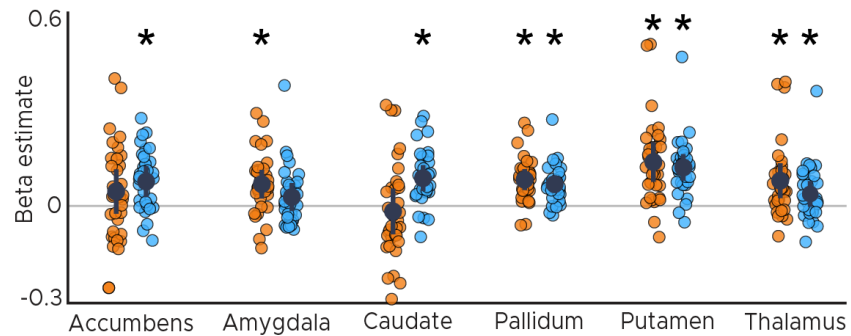

**Figure S4: Distinct networks support TTC-specific and TTC-generalized feedback learning.** A) Voxel-wise mass-univariate GLM results for TTC-generalized and TTC-specific parametric regressors. We plot thresholded t-test results at 1mm resolution. Activity maps were overlaid on a structural template brain. Positive t-scores indicate a relationship between brain activity and the updating of either TTC-specific or TTC-generalized information respectively. B) ROI-analysis results for subcortical regions for TTC-generalized (orange dots) and TTC-specific regressors (blue dots). Depicted are the mean and SEM across participants (black dot and line) overlaid on single participant data. Statistics reflect  $p < 0.05$  at Bonferroni-corrected levels (\*) obtained using a group-level one-tailed one-sample t-test against zero.

### A) TTC-generalized hippocampal connectivity to subcortex

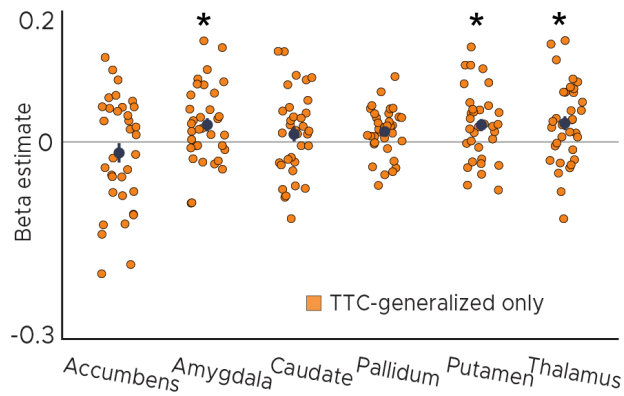

### B) Whole-brain TTC-generalized hippocampal connectivity

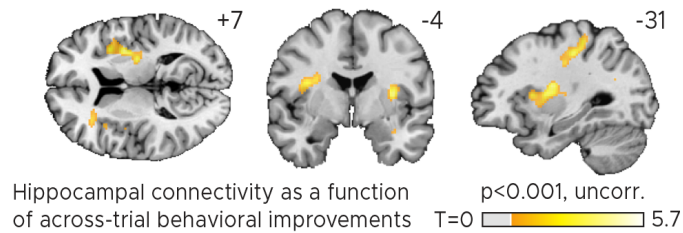

**Figure S5: TTC-generalized hippocampal connectivity.** A) Regions of interest analysis for subcortical regions estimated using a Psychophysiological-interactions (PPI) analysis conducted using the hippocampal effect in Fig.4A as a seed. Positive beta estimates indicate that functional connectivity between each ROI and the hippocampal seed depended on how much participants TTC-task performance improved across trials. Depicted are the mean and SEM across participants (black dot and line) overlaid on single participant data for the nucleus accumbens, the amygdala, the caudate, the globus pallidum, the putamen and the thalamus. Statistics reflect  $p < 0.05$  at Bonferroni-corrected levels (\*) obtained using a group-level one-tailed one-sample t-test against zero. B) Whole-brain voxel-wise t-test results for the TTC-generalized hippocampal connectivity overlaid on a structural template brain at 1mm resolution. MNI coordinates added.

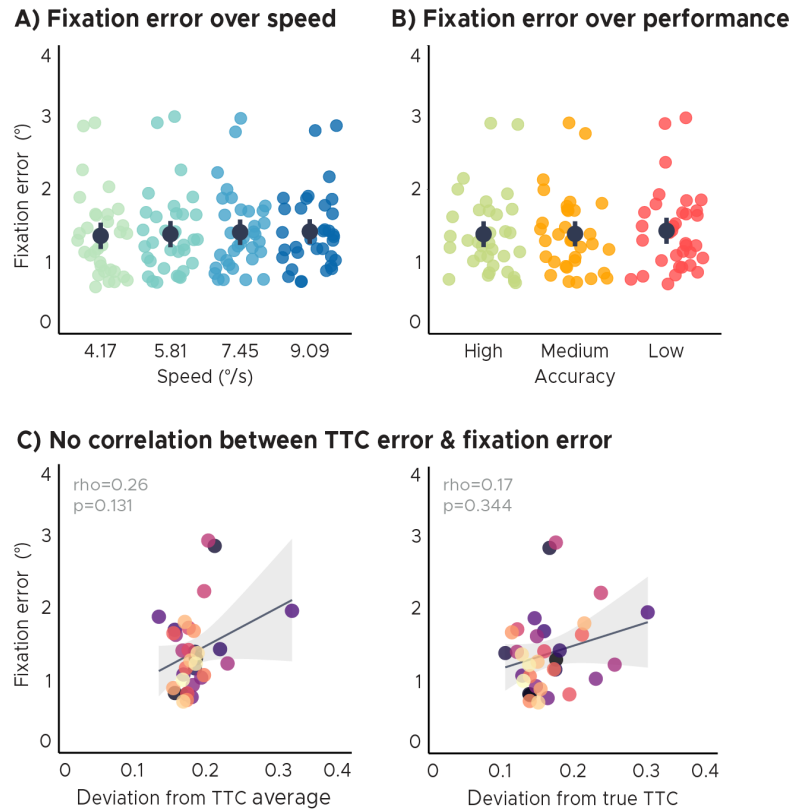

**Figure S6: Eye tracking analyses. A) Fixation error over speed. There were no significant differences in fixation error across speed levels/target TTC's. B) Fixation error over TTC-task performance. There were no significant differences in fixation error across TTC-task performance levels. C) No correlation of the behavioral regression-to-the-mean effect or TTC-task performance with fixation error. Fixation quality does not affect the interpretation of the imaging results presented in this study. Each dot represents a single participant. Participants were color coded. Regression line (black) and standard error (gray shade). AB) Group-level mean and SEM depicted as black dot and line overlaid on single participant data.**
